# Supplementary material for: Identification of Synergistic Drug Combinations to Target KRAS-Driven Chemoradioresistant Cancers Utilizing Tumoroid Models of Colorectal Adenocarcinoma and Recurrent Glioblastoma
Source: PubMed Central journal article supplement (PMC9158132; doi:10.3389/fonc.2022.840241), 2022-05-18
Supplement: DataSheet_2.pdf [file DataSheet_2.pdf]

**(A).** Co-operative association between drivers of stemness and proliferation (WNT/KRAS) in advanced cancers.

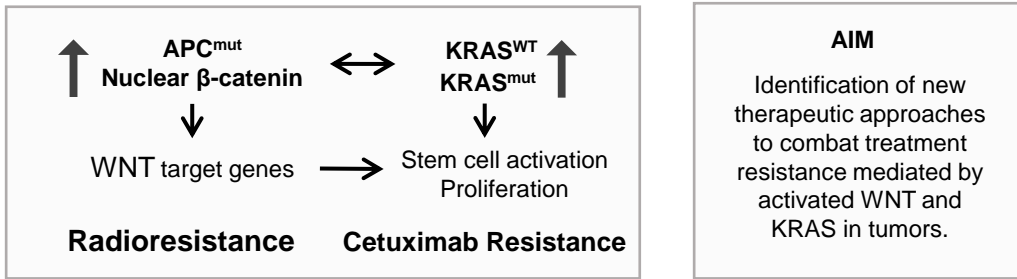

**(B).**

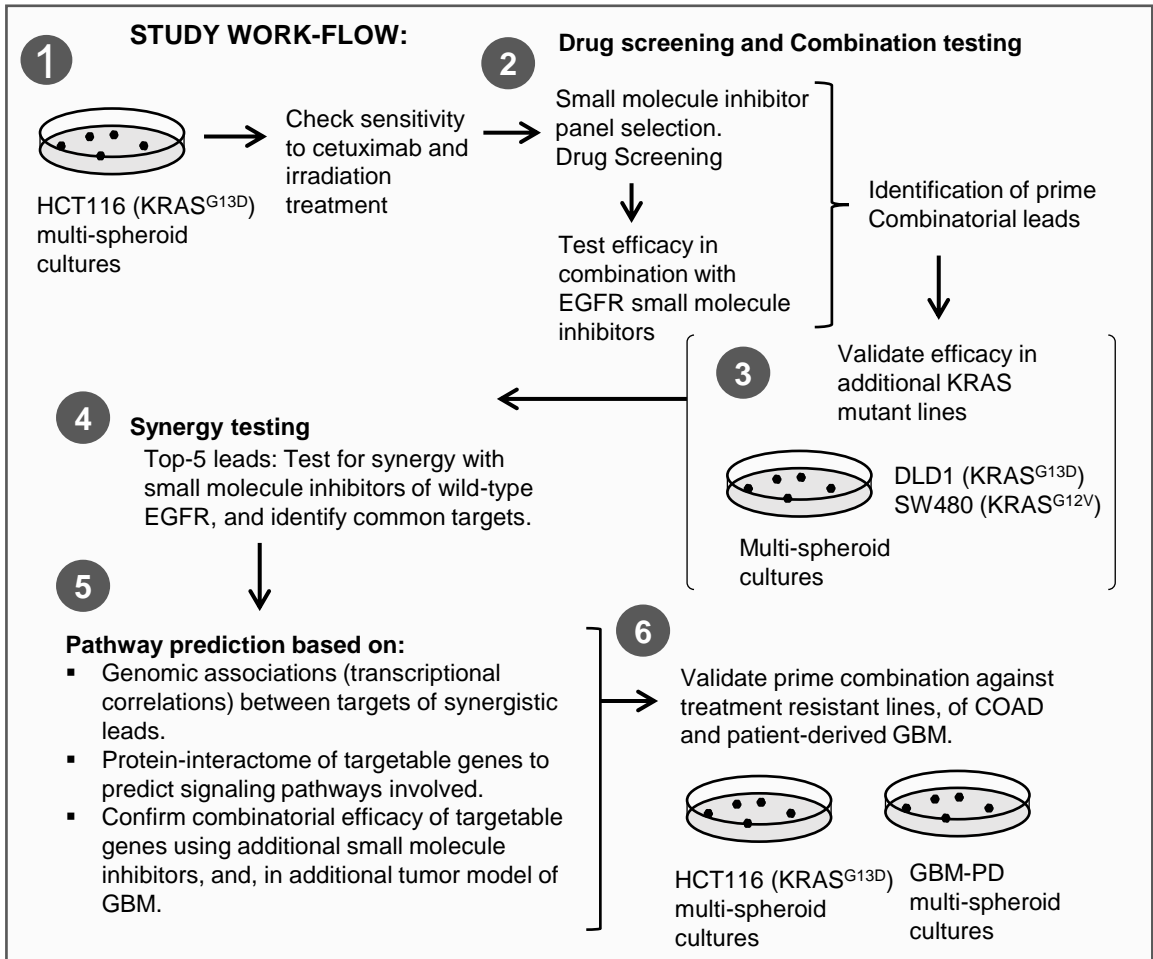

**(C).**

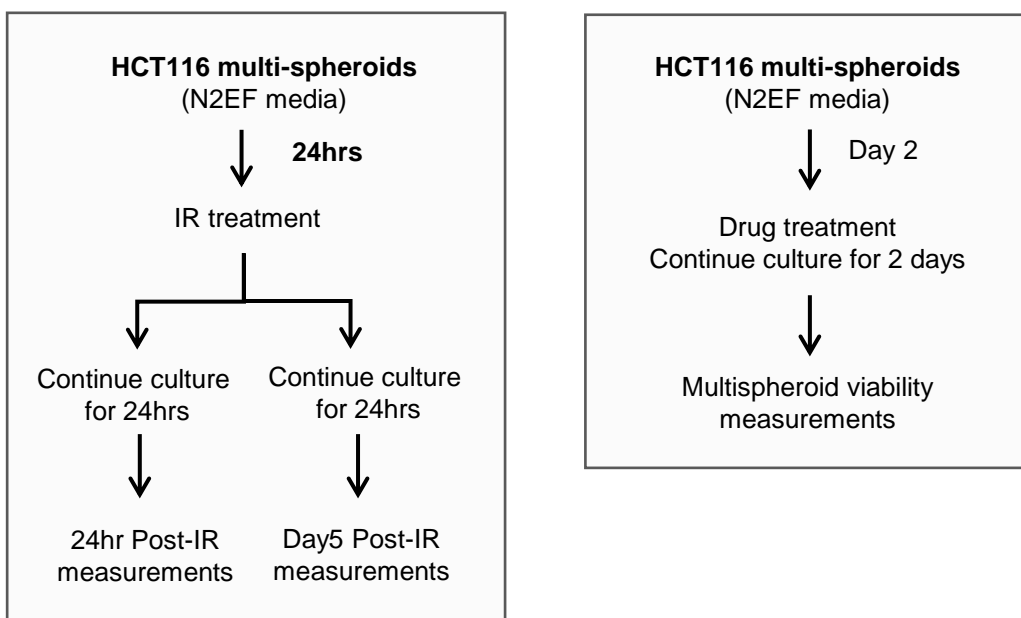

**Supplementary figure 1: (A).** Illustration (Literature-based) to represent that, mutant (inactive) APC protein and high-nuclear  $\beta$ -catenin co-operate bidirectionally with upregulated KRAS signaling. Together, WNT effector activation, and activated KRAS protein mediate radioresistance and cetuximab resistance observed in advanced refractory tumors. To the right is study aim stated. **(B).** Illustration to depict the study work-flow. **(C).** **(i)** Experimental scheme to investigate internal resistance to radiation in HCT116 multi-spheroids. **(ii)** Scheme utilized to perform drug treatments and multi-spheroid viability assays in HCT116.

**Table 1: Culture conditions used for multi-spheroid growth.**

| Tumor Type | Cell Lines | Media    |     | Media supplements |        |     |      |      |
|------------|------------|----------|-----|-------------------|--------|-----|------|------|
|            |            |          | FBS | N2                | N21max | EGF | FGF2 | ITSx |
| COAD       | HCT116     | DMEM F12 | -   | +                 | -      | +   | +    | -    |
|            |            | DMEM F12 | -   | +                 | +      | -   | -    | -    |
| COAD       | DLD1       | RPMI     | -   | +                 | +      | -   | -    | -    |
| COAD       | SW480      | DMEM F12 | -   | +                 | +      | -   | -    | -    |
| GBM        | U251       | DMEM F12 | -   | +                 | -      | +   | +    | +    |
| GBM-PD     | GBM965     | DMEM F12 | -   | +                 | +      | +   | +    | +    |
| GBM-PD     | QNS108     | DMEM F12 | -   | +                 | +      | +   | +    | +    |

**(A).** Floating culture of HCT116 and DLD1 in Ultra low attachment 6 well plate.

Images (4x) in Bright field (BF) at day10 in culture.

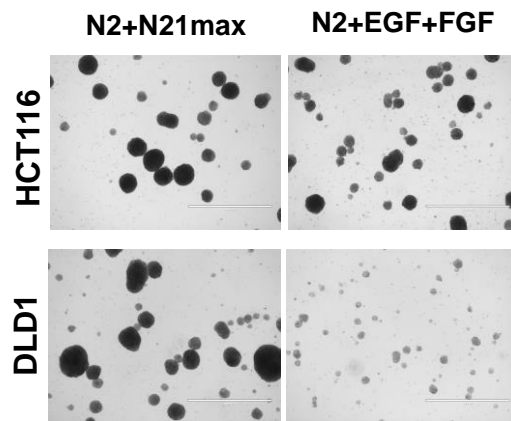

**(B).** HCT116 and DLD1: cultured in standard 96 well plate.

Images (4x) and (10x) in Bright field at day 3 in culture.

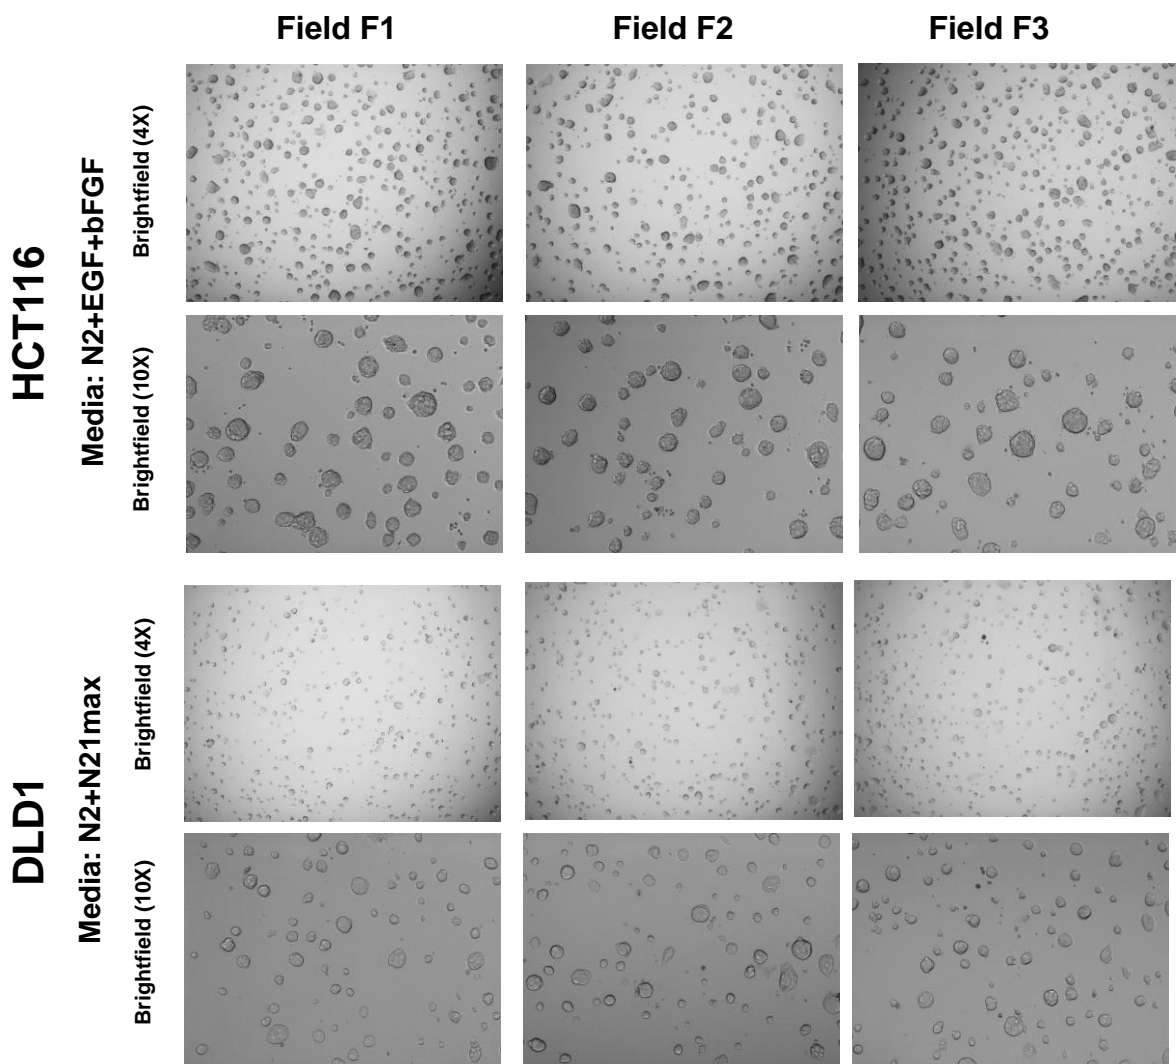

**(C). Spheroid size and growth evaluation:**

**(i)** Images (4x) in Bright field (BF) at day 7 (1 week) in culture.

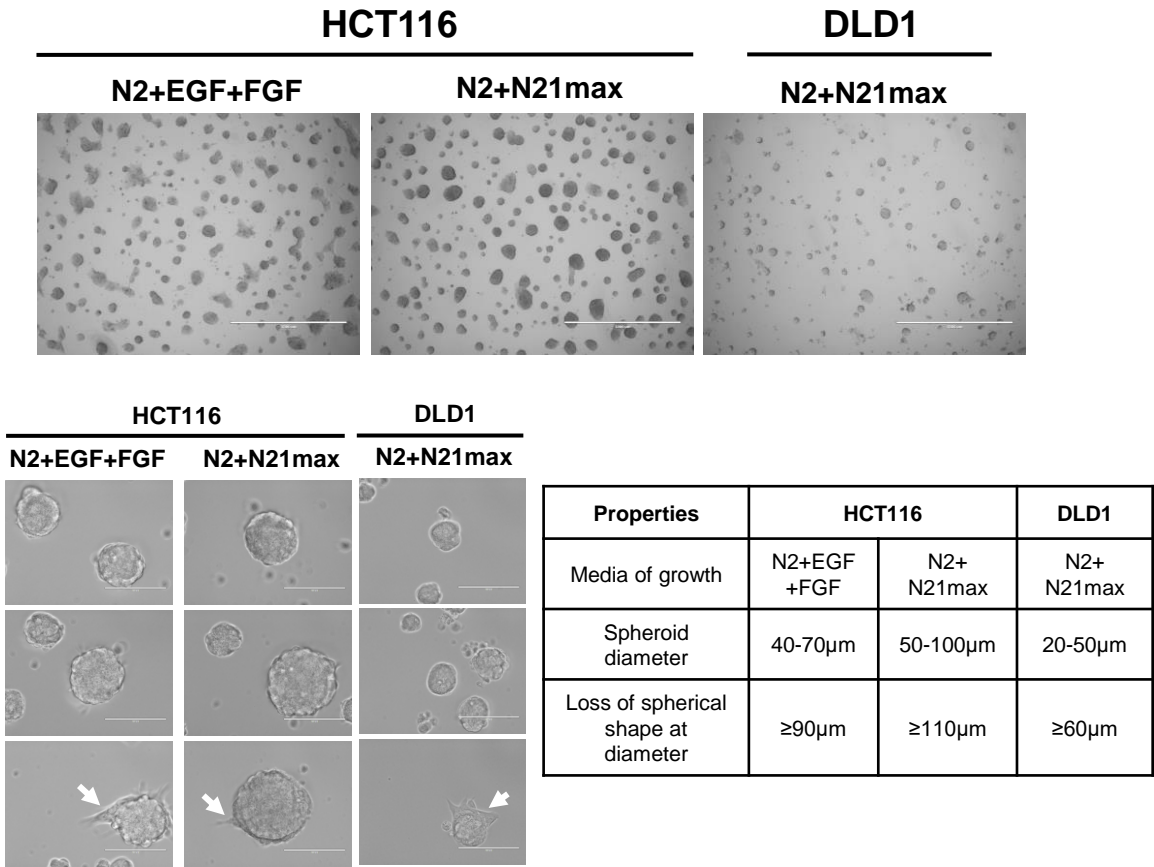

**(ii)**

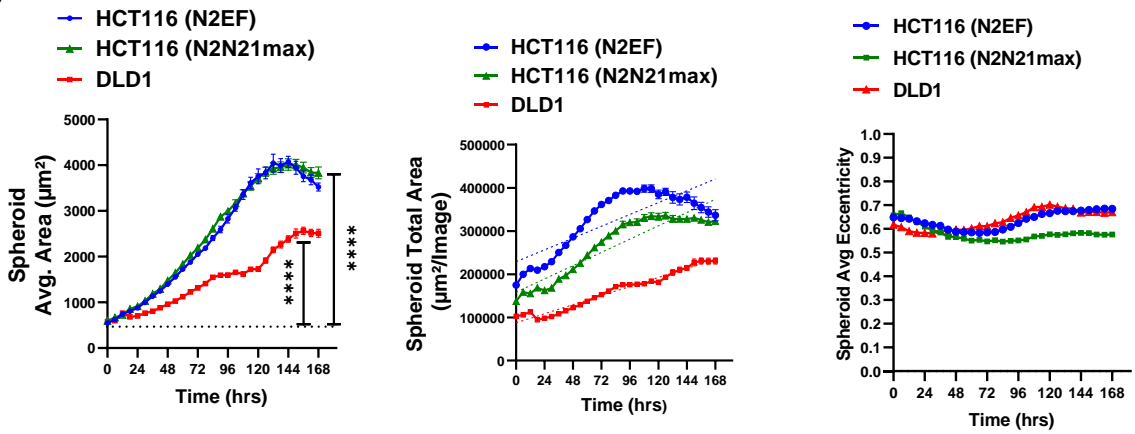

| Slope of the curve for Spheroid Total Area |                          |                         |
|--------------------------------------------|--------------------------|-------------------------|
| HCT116 (N2EF)                              | HCT116 (N2N21max)        | DLD1 (N2N21max)         |
| Slope = 1140, P < 0.0001                   | Slope = 1282, P < 0.0001 | Slope = 876, P < 0.0001 |

**(iii)**

**SW480 multi-spheroid growth**

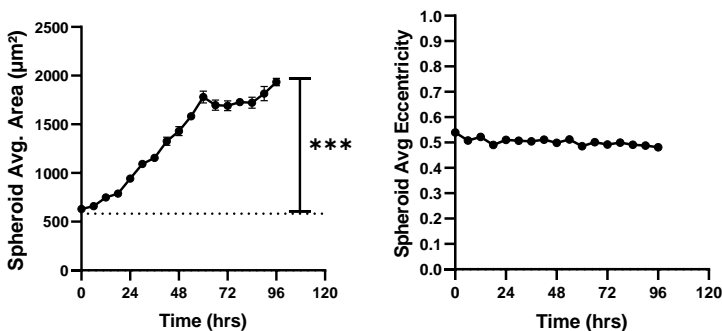

**(D).** Evaluation of intrinsic resistance to cetuximab and single-dose IR treatment in multi-spheroids of HCT116.

**(i)** HCT116 multi-spheroids cultured in media: N2EFmax.

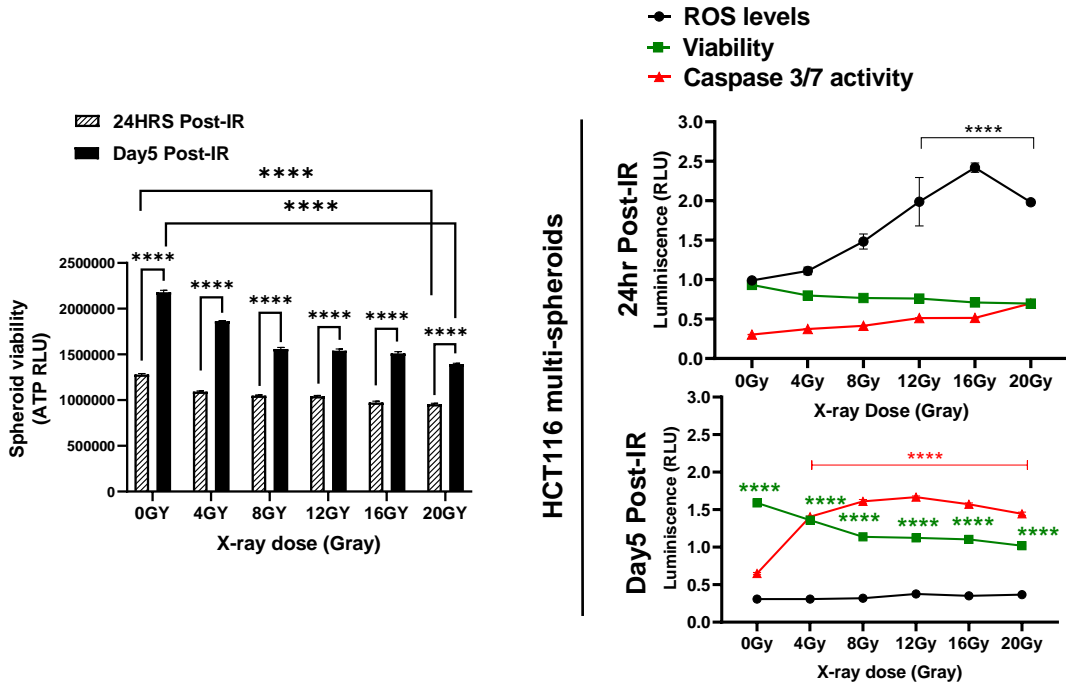

**(ii)** HCT116 multi-spheroids cultured in media: N2N21max.

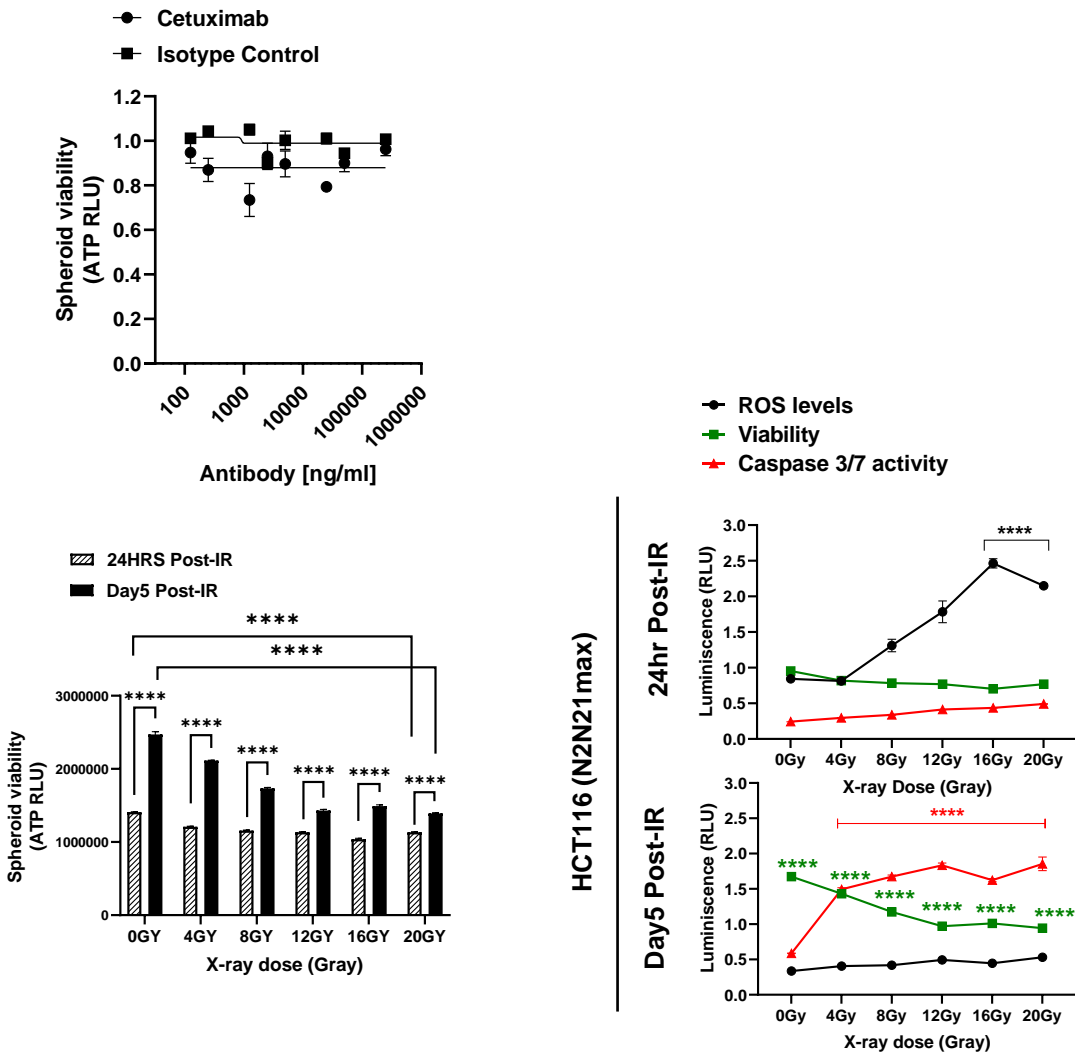

**Supplementary Figure 2:** Table-1, Culture media conditions used for obtaining spheroids from respective cell lines. **(A).** Representative bright field images (4x) showing spheroids obtained from floating cultures of HCT116 and DLD1 in media conditions indicated. **(B).** Three independent Bright field images (4x, and 10x) of multi-spheroids obtained from HCT116 and DLD1 under indicated media conditions, at day3 in culture. **(C).** Spheroid size and growth evaluation. (i) Bright field (BF) images at 4x, and 40x, for HCT116 cultured in N2EF vs. N2N21max media, and DLD1 in N2N21max media. Approximately 15 independent images under each condition were taken using EVOS FL microscope, and the spheroid diameter was averaged. (ii) Comparing the Spheroid growth parameters, spheroid Average Area ( $\mu\text{m}^2$ ) and, spheroid total area ( $\mu\text{m}^2/\text{image}$ ) and spheroid average eccentricity for HCT116 and DLD1 multi-spheroids cultured in 96 well plate, under media conditions indicated, and over a period of 168hrs (day7). (iii) Graph (left): Increase in Spheroid average area for SW480 cell line over a period of 5 days. Graph (right), Spheroid average eccentricity for SW480. **(D).** **(i)** Evaluation of intrinsic resistant to radiation in HCT116 multi-spheroids cultured in N2EF media. Bar graphs indicate that despite notable reduction in growth of spheroids between 0Gy to 20Gy, significant rise in spheroid viability is observed by Day 5post-IR as opposed to spheroids at 24hr-post IR, at each of the radiation doses administered. ROS levels, spheroid viability and Caspase 3/7 activity measured 24hrs post-IR, and, at Day5 post-IR and normalized data for each of the parameters is represented at the right. Significance in change of spheroid viability between 24hr-post IR and Day5 post-IR at respective IR-dose treatment is indicated (\*\*\*\*, p-value < 0.0001). **(ii)** Spheroid viability in response to Cetuximab (anti-EGFR) treatment on HCT116 multi-spheroids cultured in N2N21max media. To the bottom, is effect of irradiation on growth and survival of HCT116 spheroids (cultured in N2N21max).

**(A).** Spheroid viability dose-response curves for COAD cell lines.

**(i)**

**HCT116 (cultured in media N2EF)**

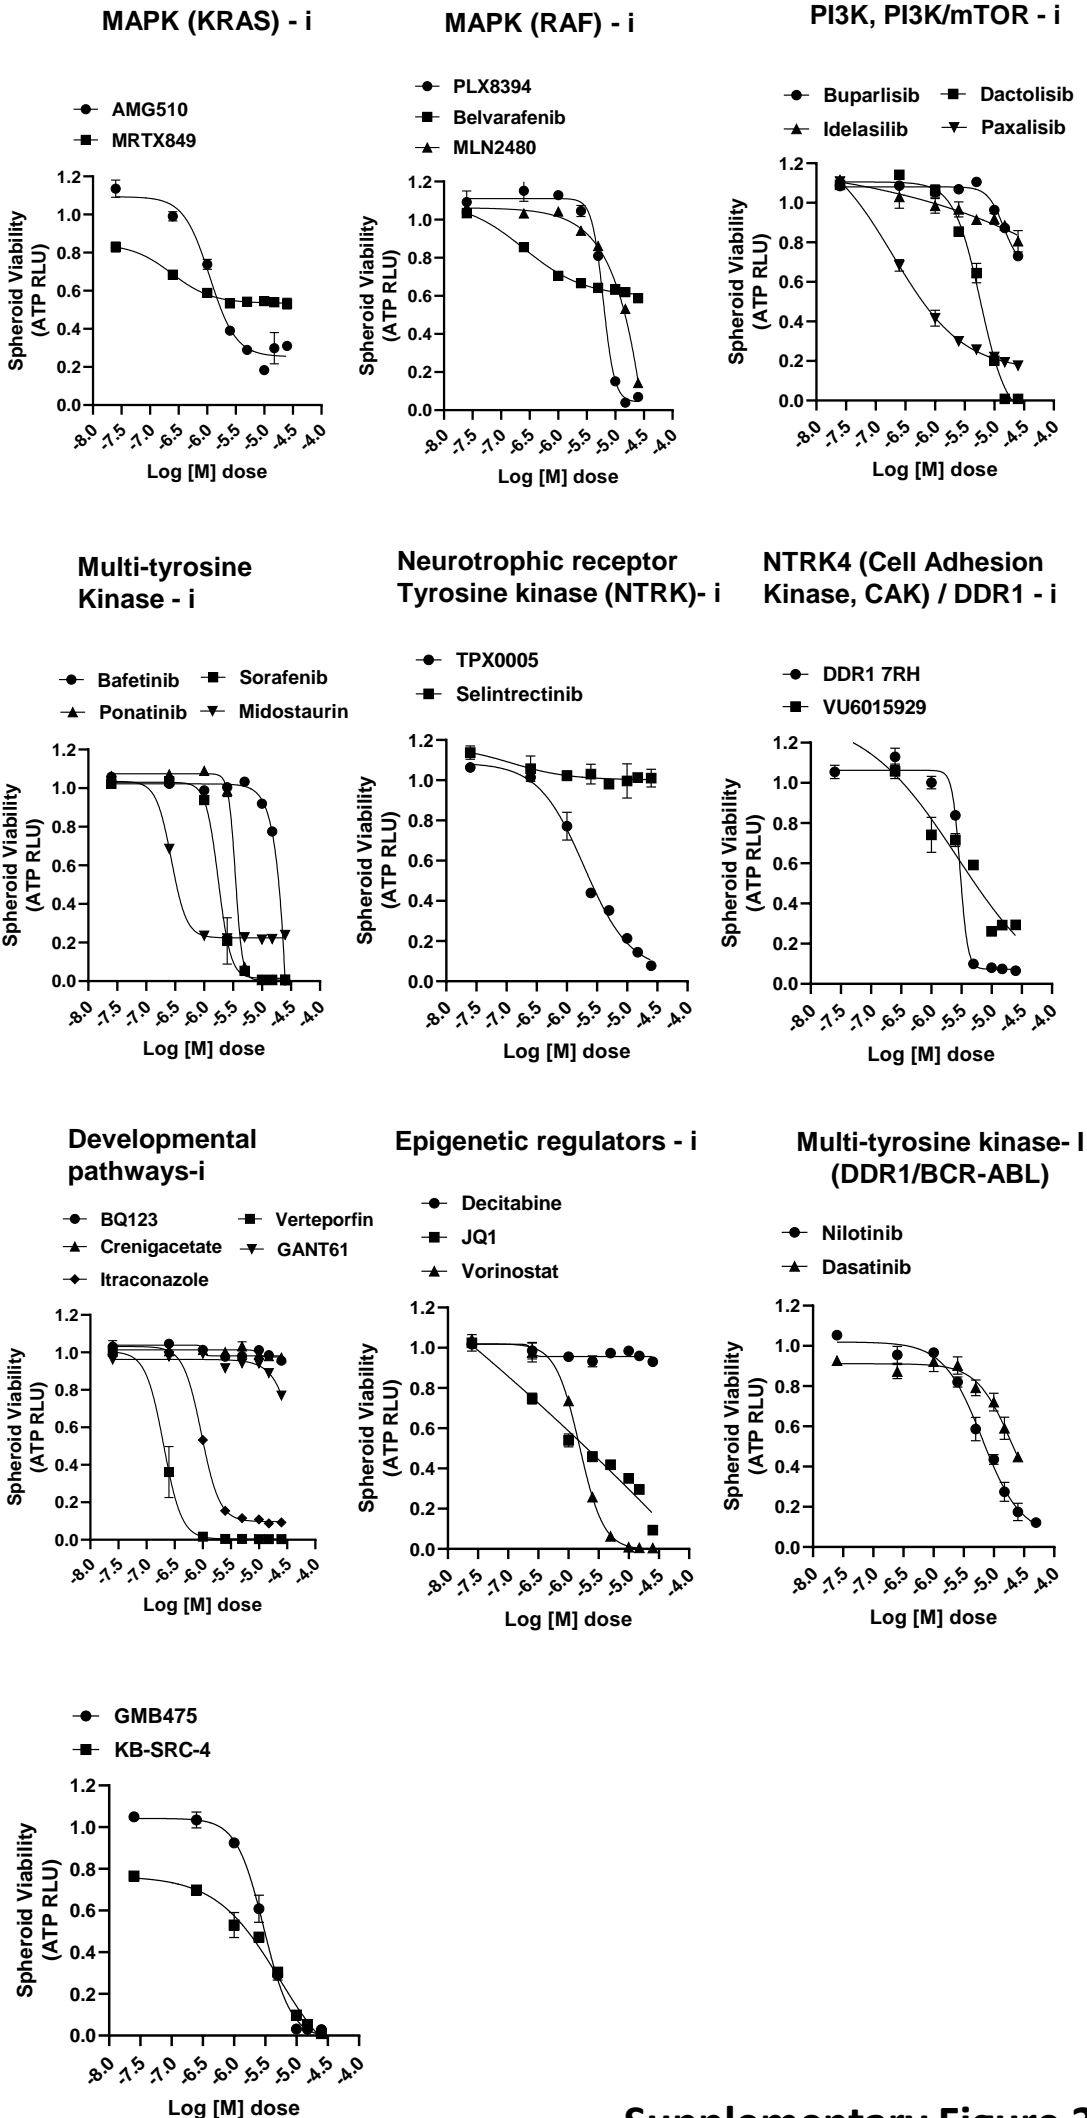

**(ii) HCT116 (cultured in media N2N21max)**

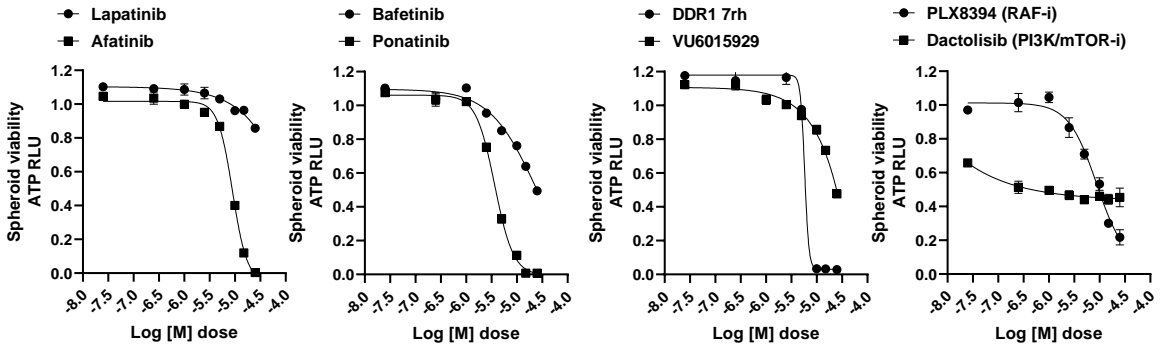

**(iii) DLD1**

RAF - i, PI3K/mTOR - i

Multi tyrosine kinase - i

NTRK4 (DDR1) - i

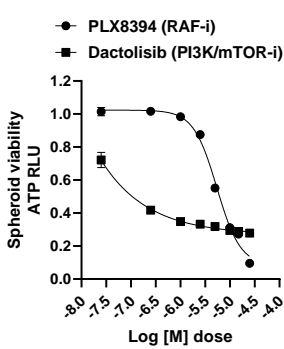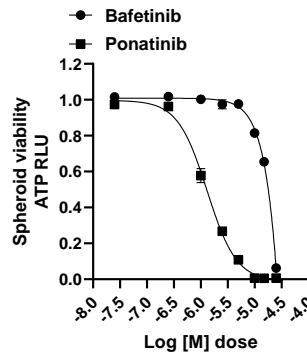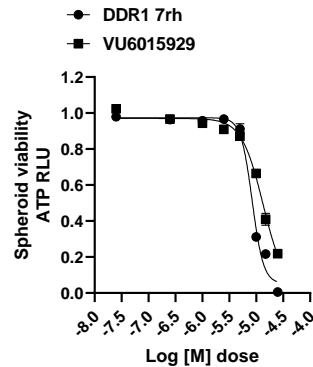

**(iv) SW480**

RAF - i, PI3K/mTOR - i

Multi tyrosine kinase - i

NTRK4 (DDR1)- i

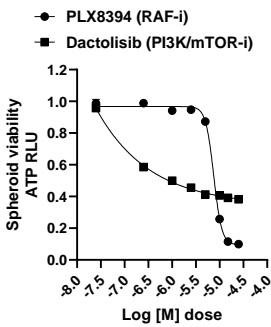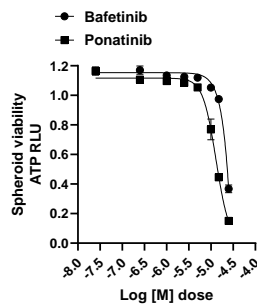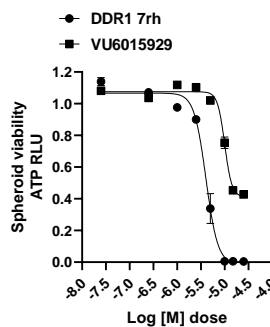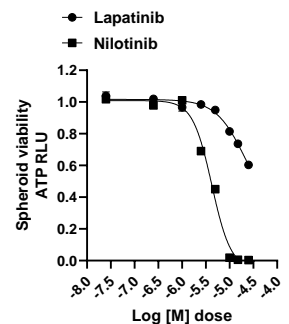

**(B). Spheroid viability dose-response curves for Glioblastoma lines.**

U251

Patient-derived GBM lines

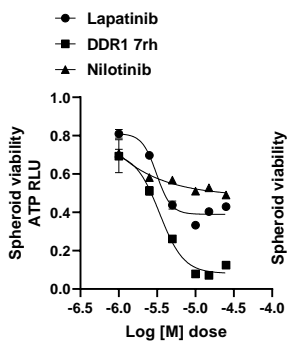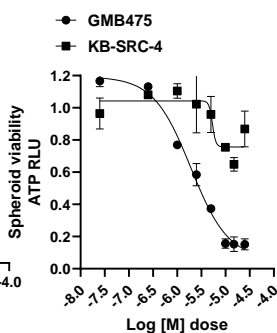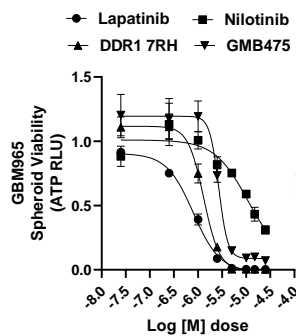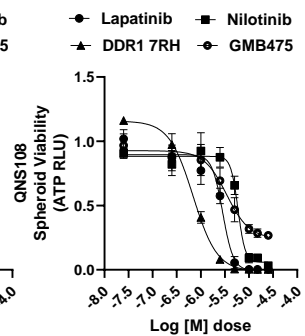



**Supplementary Figure 3: (A).** Spheroid viability curves for colorectal adenocarcinoma lines (i) HCT116 (cultured in media N2EF), (ii) HCT116 (cultured in media N2EF), (iii) DLD1, (iv) SW480, when administered with drugs as single agents, for each of inhibitor class indicated. **(B).** Spheroid viability curves for glioblastoma lines (U251, and Patient-derived GBM lines: GBM965 and QNS108) when administered with respective drugs as single agent.

(A).

Inhibitor combination plots of HCT116 (cultured in media N2EF).

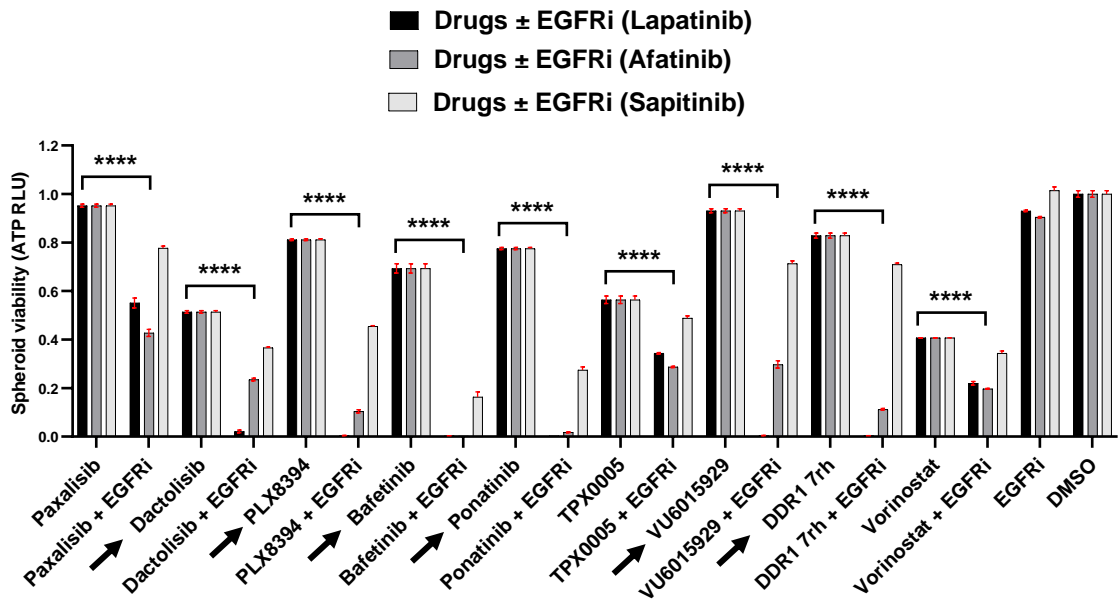

(B).

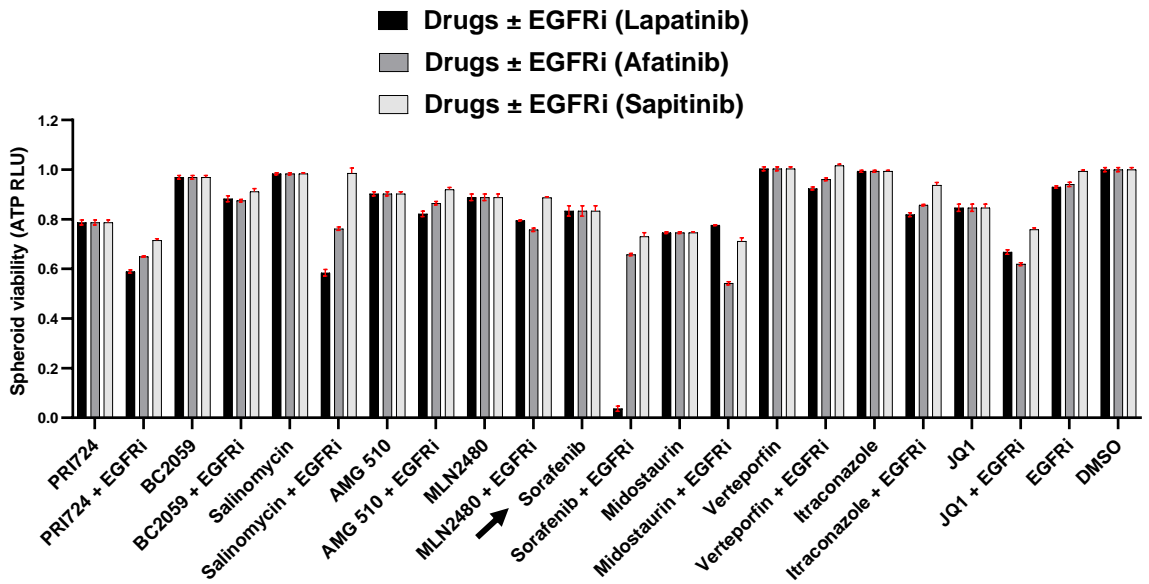

**Supplementary Figure 4: (A), (B).** Bar-graphs showing spheroid viability for HCT116 (cultured in media N2EF) when administered with drugs as single agents, or in combinations at concentrations  $\leq IC_{50}$ . Doses at which the drugs were combined, and Percent inhibition estimated has been included in Excel sheet 1.

**(A).**

|                |       | Bafetinib (nM) |      |       |       |       |       |
|----------------|-------|----------------|------|-------|-------|-------|-------|
|                |       | 0              | 3500 | 6500  | 13000 | 26000 | 37500 |
| Lapatinib (nM) | 50000 | 0.0            | 69.8 | 69.0  | 51.5  | 5.9   | 2.3   |
|                | 28000 | 0.0            | 73.9 | 75.5  | 56.5  | 6.5   | 2.5   |
|                | 14000 | 0.0            | 71.6 | 85.6  | 64.2  | 7.2   | 2.7   |
|                | 7000  | 0.0            | 54.6 | 101.5 | 77.8  | 8.7   | 3.4   |
|                | 4800  | 0.0            | 51.2 | 94.0  | 75.6  | 8.4   | 3.3   |
| 0              | 0.0   | 0.0            | 0.0  | 0.0   | 0.0   | 0.0   |       |

|                 |       | Bafetinib (nM) |      |       |        |        |        |
|-----------------|-------|----------------|------|-------|--------|--------|--------|
|                 |       | 0              | 3500 | 6500  | 13000  | 26000  | 37500  |
| Afatatinib (nM) | 50000 | 0              | 0    | 0     | 0      | -0.047 | -0.087 |
|                 | 28000 | 0              | 0    | 0.051 | 0      | -0.067 | -0.024 |
|                 | 14000 | 0              | 8.78 | 8.658 | 3.5113 | -0.017 | -0.044 |
|                 | 7000  | 0              | 0    | 23.64 | 24.183 | 0      | 0      |
|                 | 4800  | 0              | 0    | 23.22 | 27.128 | 0      | 0      |
| 0               | 0     | 0              | 0    | 0     | 0      | 0      |        |

Low High  
Synergy Scores

|                |       | Ponatinib (nM) |      |      |      |      |      |
|----------------|-------|----------------|------|------|------|------|------|
|                |       | 0              | 250  | 500  | 1500 | 3000 | 6000 |
| Lapatinib (nM) | 28000 | 0.0            | 16.2 | 39.4 | 52.2 | 48.6 | 21.0 |
|                | 14000 | 0.0            | 9.8  | 38.7 | 87.3 | 77.8 | 35.6 |
|                | 7000  | 0.0            | 13.3 | 17.5 | 85.8 | 93.3 | 43.0 |
|                | 2400  | 0.0            | 1.8  | 12.3 | 36.9 | 64.8 | 50.8 |
|                | 1200  | 0.0            | 0.0  | 0.8  | 5.1  | 27.0 | 50.0 |
| 0              | 0.0   | 0.0            | 0.0  | 0.0  | 0.0  | 0.0  |      |

|                 |       | Ponatinib (nM) |      |       |        |       |        |
|-----------------|-------|----------------|------|-------|--------|-------|--------|
|                 |       | 0              | 250  | 500   | 1500   | 3000  | 6000   |
| Afatatinib (nM) | 28000 | 0              | 0    | 0.33  | 0.1442 | 0.137 | 0      |
|                 | 14000 | 0              | 0    | 0.53  | 0.4871 | 0.29  | -0.02  |
|                 | 7000  | 0              | 0    | 0     | 62.061 | 39.94 | 1.67   |
|                 | 2400  | 0              | 4.34 | 10.95 | 48.343 | 64.05 | 2.5942 |
|                 | 1200  | 0              | 0    | 0     | 8.1662 | 61.62 | 2.6013 |
| 0               | 0     | 0              | 0    | 0     | 0      | 0     |        |

|                |       | DDR1 7RH (nM) |      |      |      |      |      |
|----------------|-------|---------------|------|------|------|------|------|
|                |       | 0             | 250  | 500  | 1500 | 3000 | 6000 |
| Lapatinib (nM) | 28000 | 0.0           | 18.3 | 18.1 | 20.0 | 16.4 | 0.0  |
|                | 14000 | 0.0           | 36.7 | 51.1 | 52.1 | 40.4 | 0.2  |
|                | 7000  | 0.0           | 0.0  | 32.6 | 87.1 | 70.6 | 0.4  |
|                | 2400  | 0.0           | 0.0  | 0.0  | 11.9 | 93.2 | 0.0  |
|                | 1200  | 0.0           | 0.0  | 0.0  | 0.0  | 11.9 | 0.6  |
| 0              | 0.0   | 0.0           | 0.0  | 0.0  | 0.0  | 0.0  |      |

|                 |       | DDR1 7RH (nM) |     |       |        |       |        |
|-----------------|-------|---------------|-----|-------|--------|-------|--------|
|                 |       | 0             | 250 | 500   | 1500   | 3000  | 6000   |
| Afatatinib (nM) | 28000 | 0             | 0   | 0.244 | 0      | 0.047 | 0      |
|                 | 14000 | 0             | 0   | 5.601 | 8.2434 | 7.343 | 4.11   |
|                 | 7000  | 0             | 0   | 0     | 22.806 | 17.43 | 24.004 |
|                 | 2400  | 0             | 0   | 0.379 | 3.2071 | 29.99 | 19.682 |
|                 | 1200  | 0             | 0   | 0     | 0      | 0.609 | 0      |
| 0               | 0     | 0             | 0   | 0     | 0      | 0     |        |

|                |       | VU6015929 (nM) |       |      |      |      |       |
|----------------|-------|----------------|-------|------|------|------|-------|
|                |       | 0              | 500   | 1500 | 3000 | 6000 | 10000 |
| Lapatinib (nM) | 15000 | 0.0            | -10.7 | 0.0  | 0.0  | 63.1 | 47.3  |
|                | 10000 | 0.0            | 0.0   | 0.0  | 0.0  | 78.8 | 57.2  |
|                | 5000  | 0.0            | 0.0   | 0.0  | 0.0  | 67.1 | 56.4  |
|                | 2500  | 0.0            | 0.0   | 0.0  | 0.0  | 10.2 | 48.8  |
|                | 800   | 0.0            | 0.0   | 0.0  | -1.8 | 0.0  | 29.1  |
| 0              | 0.0   | 0.0            | 0.0   | 0.0  | 0.0  | 0.0  |       |

|                 |       | VU6015929 (nM) |      |       |        |       |        |
|-----------------|-------|----------------|------|-------|--------|-------|--------|
|                 |       | 0              | 500  | 1500  | 3000   | 6000  | 10000  |
| Afatatinib (nM) | 15000 | 0              | 0    | 0     | 0      | 1.236 | 7.5105 |
|                 | 10000 | 0              | 0    | 0     | 0      | 10.43 | 0      |
|                 | 5000  | 0              | 0    | 0     | 0      | 0     | 0      |
|                 | 2500  | 0              | 1.87 | 0     | 0.943  | 6.984 | 0      |
|                 | 800   | 0              | 10.1 | 1.153 | 0.6709 | 3.011 | 2.1701 |
| 0               | 0     | 0              | 0    | 0     | 0      | 0     |        |

|                |       | PLX8394 (nM) |      |       |        |       |        |
|----------------|-------|--------------|------|-------|--------|-------|--------|
|                |       | 0            | 500  | 1500  | 3000   | 6000  | 10000  |
| Lapatinib (nM) | 15000 | 0            | 1.81 | 57.81 | 92.719 | 100.3 | 86.322 |
|                | 10000 | 0            | 2.76 | 12.83 | 59.893 | 96.64 | 85.687 |
|                | 5000  | 0            | 5.64 | 13.42 | 28.574 | 56.25 | 64.363 |
|                | 2500  | 0            | 0    | 10.28 | 25.438 | 34.26 | 32.936 |
|                | 800   | 0            | 0    | 0     | 11.94  | 17.8  | 12.451 |
| 0              | 0     | 0            | 0    | 0     | 0      | 0     |        |

|                 |       | PLX8394 (nM) |      |       |        |       |        |
|-----------------|-------|--------------|------|-------|--------|-------|--------|
|                 |       | 0            | 500  | 1500  | 3000   | 6000  | 10000  |
| Afatatinib (nM) | 15000 | 0            | 0    | 1.151 | 0.188  | 0.003 | 0      |
|                 | 10000 | 0            | 1.49 | 2.251 | 1.8913 | 0.748 | 0.5884 |
|                 | 5000  | 0            | 25.8 | 49.07 | 61.065 | 41.13 | 34.68  |
|                 | 2500  | 0            | 12.7 | 29.8  | 42.067 | 45.48 | 37.051 |
|                 | 800   | 0            | 0.89 | 9.15  | 11.312 | 18.72 | 12.824 |
| 0               | 0     | 0            | 0    | 0     | 0      | 0     |        |

**(B).**

|                |       | Bafetinib (nM) |         |        |        |        |        |
|----------------|-------|----------------|---------|--------|--------|--------|--------|
|                |       | 0              | 3500    | 6500   | 13000  | 26000  | 37500  |
| Lapatinib (nM) | 50000 | 43.0           | 99.2    | 99.7   | 99.9   | 99.9   | 99.8   |
|                | 28000 | 37.1           | 98.1    | 99.7   | 99.8   | 99.9   | 99.8   |
|                | 14000 | 28.0           | 92.0    | 99.6   | 99.9   | 99.9   | 99.7   |
|                | 7000  | 13.3           | 73.5    | 98.2   | 99.9   | 99.8   | 99.7   |
|                | 4800  | 15.2           | 64.0    | 94.4   | 100.0  | 99.8   | 99.7   |
| 0              | 0     | 3.9            | -7.8143 | -4.843 | 22.441 | 91.155 | 96.123 |

|                 |       | Bafetinib (nM) |       |       |       |        |       |
|-----------------|-------|----------------|-------|-------|-------|--------|-------|
|                 |       | 0              | 3500  | 6500  | 13000 | 26000  | 37500 |
| Afatatinib (nM) | 50000 | 99.83          | 99.78 | 99.85 | 99.83 | 99.91  | 99.89 |
|                 | 28000 | 99.77          | 99.90 | 99.94 | 99.88 | 99.90  | 99.91 |
|                 | 14000 | 91.57          | 99.60 | 99.80 | 99.83 | 99.92  | 99.85 |
|                 | 7000  | 38.82          | 58.30 | 87.42 | 99.82 | 99.90  | 99.83 |
|                 | 4800  | 25.72          | 40.07 | 62.77 | 99.79 | 99.87  | 99.81 |
| 0               | 0.00  | 7.96           | 12.1  | 63.8  | 99.8  | 99.744 |       |

Low High  
Percent inhibition

|                |       | Ponatinib (nM) |        |        |        |         |      |
|----------------|-------|----------------|--------|--------|--------|---------|------|
|                |       | 0              | 250    | 500    | 1500   | 3000    | 6000 |
| Lapatinib (nM) | 28000 | 50.5           | 82.88  | 93.4   | 99.0   | 99.5    | 99.7 |
|                | 14000 | 23.8           | 47.127 | 64.4   | 99.6   | 99.7    | 99.8 |
|                | 7000  | 9.2            | 17.79  | 26.1   | 91.0   | 99.8    | 99.8 |
|                | 2400  | -6.8           | -5.8   | 1.1    | 30.0   | 75.3    | 98.5 |
|                | 1200  | -5.0           | -11.4  | -5.7   | 5.6    | 36.7    | 85.1 |
| 0              | 0.0   | -10.202        | -12.94 | -10.19 | 1.9109 | 54.0119 |      |

|                 |       | Ponatinib (nM) |       |       |       |        |       |
|-----------------|-------|----------------|-------|-------|-------|--------|-------|
|                 |       | 0              | 250   | 500   | 1500  | 3000   | 6000  |
| Afatatinib (nM) | 28000 | 99.65          | 99.54 | 99.95 | 99.84 | 99.93  | 99.92 |
|                 | 14000 | 99.46          | 99.69 | 99.94 | 99.95 | 99.92  | 99.96 |
|                 | 7000  | 41.29          | 33.69 | 43.18 | 99.86 | 99.92  | 99.95 |
|                 | 2400  | 3.50           | 4.77  | 8.06  | 54.48 | 98.52  | 99.83 |
|                 | 1200  | 3.74           | -1.72 | -0.43 | 24.38 | 96.09  | 99.88 |
| 0               | 0.00  | -6.15          | -8.38 | -6.12 | 31.73 | 97.075 |       |

|                |       | DDR1 7RH (nM) |       |       |      |      |      |
|----------------|-------|---------------|-------|-------|------|------|------|
|                |       | 0             | 250   | 500   | 1500 | 3000 | 6000 |
| Lapatinib (nM) | 28000 | 81.5          | 98.8  | 99.5  | 99.7 | 99.8 | 99.8 |
|                | 14000 | 53.1          | 91.5  | 99.7  | 99.9 | 99.6 | 99.9 |
|                | 7000  | 21.7          | 35.6  | 53.0  | 99.9 | 99.9 | 99.9 |
|                | 2400  | -3.4          | -0.7  | 1.6   | 24.9 | 99.9 | 99.6 |
|                | 1200  | -4.9          | -9.2  | -8.4  | -3.6 | 34.3 | 99.8 |
| 0              | 0.0   | -11.9         | -10.5 | -11.3 | 9.8  | 99.2 |      |

|                 |       | DDR1 7RH (nM) |       |       |       |        |       |
|-----------------|-------|---------------|-------|-------|-------|--------|-------|
|                 |       | 0             | 250   | 500   | 1500  | 3000   | 6000  |
| Afatatinib (nM) | 28000 | 99.58         | 99.47 | 99.87 | 99.67 | 99.74  | 99.77 |
|                 | 14000 | 89.90         | 89.00 | 95.78 | 98.33 | 99.36  | 99.82 |
|                 | 7000  | 42.40         | 36.76 | 33.64 | 67.85 | 84.19  | 99.72 |
|                 | 2400  | 5.25          | 7.44  | 9.26  | 12.09 | 60.57  | 90.27 |
|                 | 1200  | 4.88          | -0.20 | 0.63  | 6.64  | 42.54  | 69.42 |
| 0               | 0.00  | -5.47         | -5.24 | -2.59 | 19.75 | 57.931 |       |

|                |       | VU6015929 (nM) |      |      |      |       |       |
|----------------|-------|----------------|------|------|------|-------|-------|
|                |       | 0              | 500  | 1500 | 3000 | 6000  | 10000 |
| Lapatinib (nM) | 15000 | 28.8           | 14.2 | 17.0 | 56.3 | 99.2  | 97.6  |
|                | 10000 | 13.3           | 13.7 | 7.0  | 45.2 | 99.0  | 96.0  |
|                | 5000  | 5.3            | 7.7  | 11.4 | 10.0 | 86.7  | 91.7  |
|                | 2500  | 0.1            | 4.8  | 7.4  | 0.0  | 26.9  | 81.6  |
|                | 800   | 1.1            | 1.7  | 3.1  | -8.6 | 14.6  | 62.9  |
| 0              | 0.0   | 5.62           | 4.57 | 2.14 | 9.81 | 29.83 |       |

|                 |       | VU6015929 (nM) |       |       |       |        |       |
|-----------------|-------|----------------|-------|-------|-------|--------|-------|
|                 |       | 0              | 500   | 1500  | 3000  | 6000   | 10000 |
| Afatatinib (nM) | 15000 | 78.01          | 54.96 | 83.71 | 81.93 | 89.14  | 92.79 |
|                 | 10000 | 25.36          | 27.00 | 30.77 | 37.69 | 40.00  | 42.42 |
|                 | 5000  | 8.66           | 8.18  | 13.31 | 13.75 | 15.58  | 14.08 |
|                 | 2500  | -2.92          | 4.12  | 5.45  | 5.50  | 7.06   | 10.94 |
|                 | 800   | -10.85         | 0.65  | -3.05 | -0.01 | -0.03  | 2.08  |
| 0               | 0.00  | -14.8          | -11.4 | -6.16 | -8.53 | -8.286 |       |

|                |       | PLX8394 (nM) |       |       |       |      |       |
|----------------|-------|--------------|-------|-------|-------|------|-------|
|                |       | 0            | 500   | 1500  | 3000  | 6000 | 10000 |
| Lapatinib (nM) | 15000 | 3.2          | 12.9  | 48.7  | 81.6  | 92.3 | 93.1  |
|                | 10000 | -1.4         | 7.5   | 16.0  | 58.0  | 87.0 | 87.6  |
|                | 5000  | -7.7         | -2.6  | 5.8   | 14.0  | 50.1 | 68.0  |
|                | 2500  | -11.5        | -8.7  | -3.9  | -1.2  | 15.2 | 35.2  |
|                | 800   | -13.1        | -15.7 | -9.7  | -13.2 | 0.6  | 12.0  |
| 0              | 0.0   | -19.6        | -19.3 | -18.9 | -11.6 | 1.5  |       |

|                 |       | PLX8394 (nM) |       |       |       |        |       |
|-----------------|-------|--------------|-------|-------|-------|--------|-------|
|                 |       | 0            | 500   | 1500  | 3000  | 6000   | 10000 |
| Afatatinib (nM) | 15000 | 98.78        | 98.55 | 99.87 | 99.43 | 99.65  | 99.56 |
|                 | 10000 | 97.77        | 99.19 | 99.79 | 99.86 | 99.84  | 99.85 |
|                 | 5000  | 9.84         | 27.20 | 73.17 | 90.84 | 99.64  | 99.81 |
|                 | 2500  | -8.83        | -1.37 | 20.92 | 62.61 | 95.93  | 97.30 |
|                 | 800   | -9.80        | -9.16 | 4.72  | 42.28 | 73.40  | 82.09 |
| 0               | 0.00  | -17.4        | -10.2 | 8.2   | 55.08 | 62.911 |       |

**(C)** Dot plots and Spheroid viability graphs for Synergy testing in HCT116.

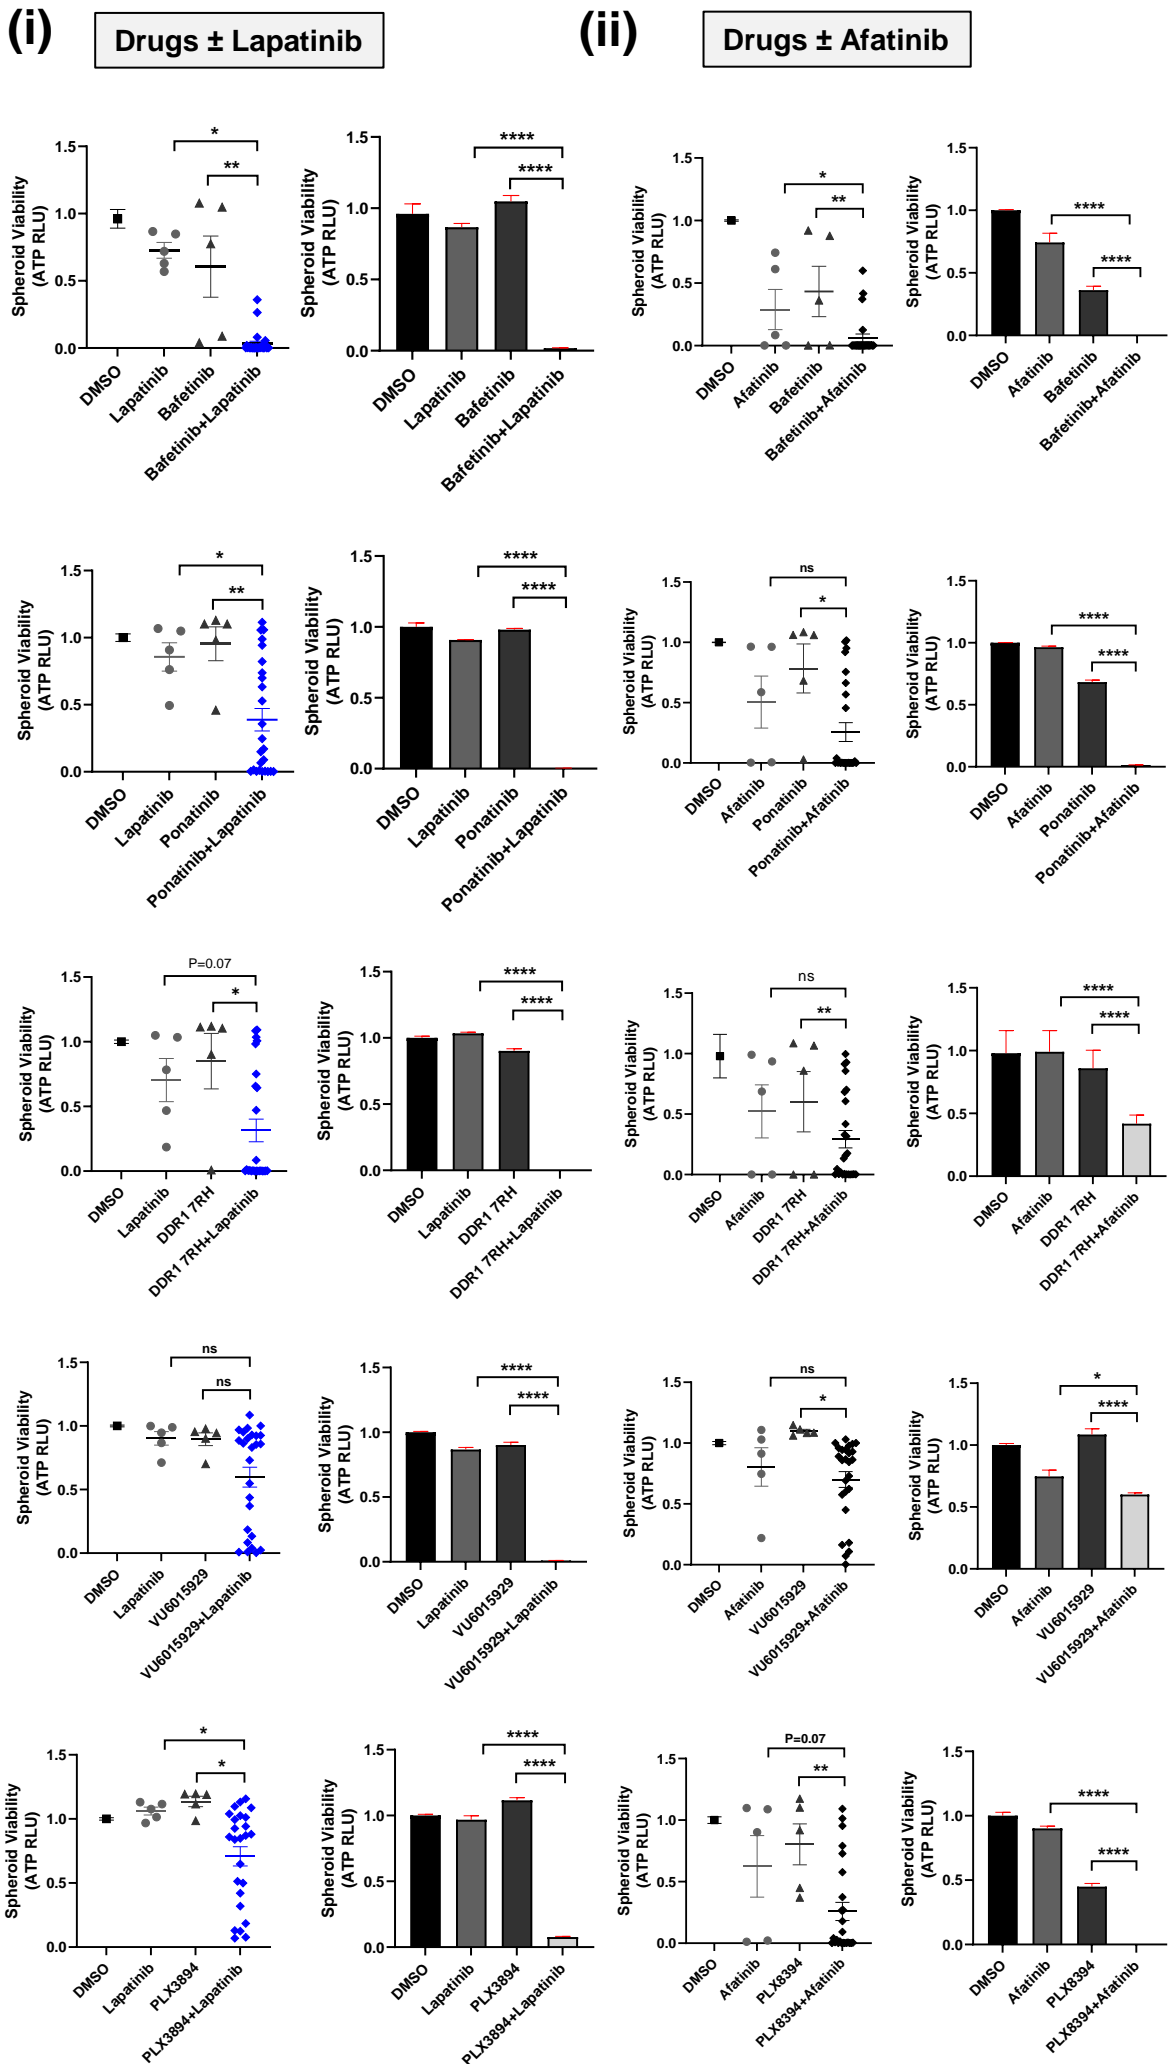

Table 2: Synergy scores obtained in HCT116 multispheroid viability assay.

|           |           | Cumulative scores obtained |            | Max. Synergy obtained at: |             |               |
|-----------|-----------|----------------------------|------------|---------------------------|-------------|---------------|
| Drug 1    | Drug 2    | Synergy Score              | Antagonism | Drug 1                    | Drug 2      | Synergy score |
| Lapatinib | Bafetinib | 1123.4                     | 0          | 7 $\mu$ M                 | 6.5 $\mu$ M | 101.45        |
|           | Ponatinib | 928.87                     | 0          | 7 $\mu$ M                 | 3 $\mu$ M   | 93.3          |
|           | DDR1 7rh  | 561.5                      | 0          | 2.4 $\mu$ M               | 3 $\mu$ M   | 93.2          |
|           | VU6015929 | 458.13                     | -12.44     | 10 $\mu$ M                | 6 $\mu$ M   | 78.78         |
|           | PLX8394   | 910.15                     | 0          | 15 $\mu$ M                | 6 $\mu$ M   | 100.3         |
| Afatinib  | Bafetinib | 119.18                     | -0.29      | 4.8 $\mu$ M               | 13 $\mu$ M  | 27.13         |
|           | Ponatinib | 308.25                     | -0.02      | 2.4 $\mu$ M               | 3 $\mu$ M   | 64.04         |
|           | DDR1 7rh  | 143.69                     | 0          | 2.4 $\mu$ M               | 3 $\mu$ M   | 30            |
|           | VU6015929 | 46.05                      | 0          | 10 $\mu$ M                | 6 $\mu$ M   | 10.43         |
|           | PLX8394   | 439.98                     | 0          | 5 $\mu$ M                 | 3 $\mu$ M   | 61.06         |

(D).

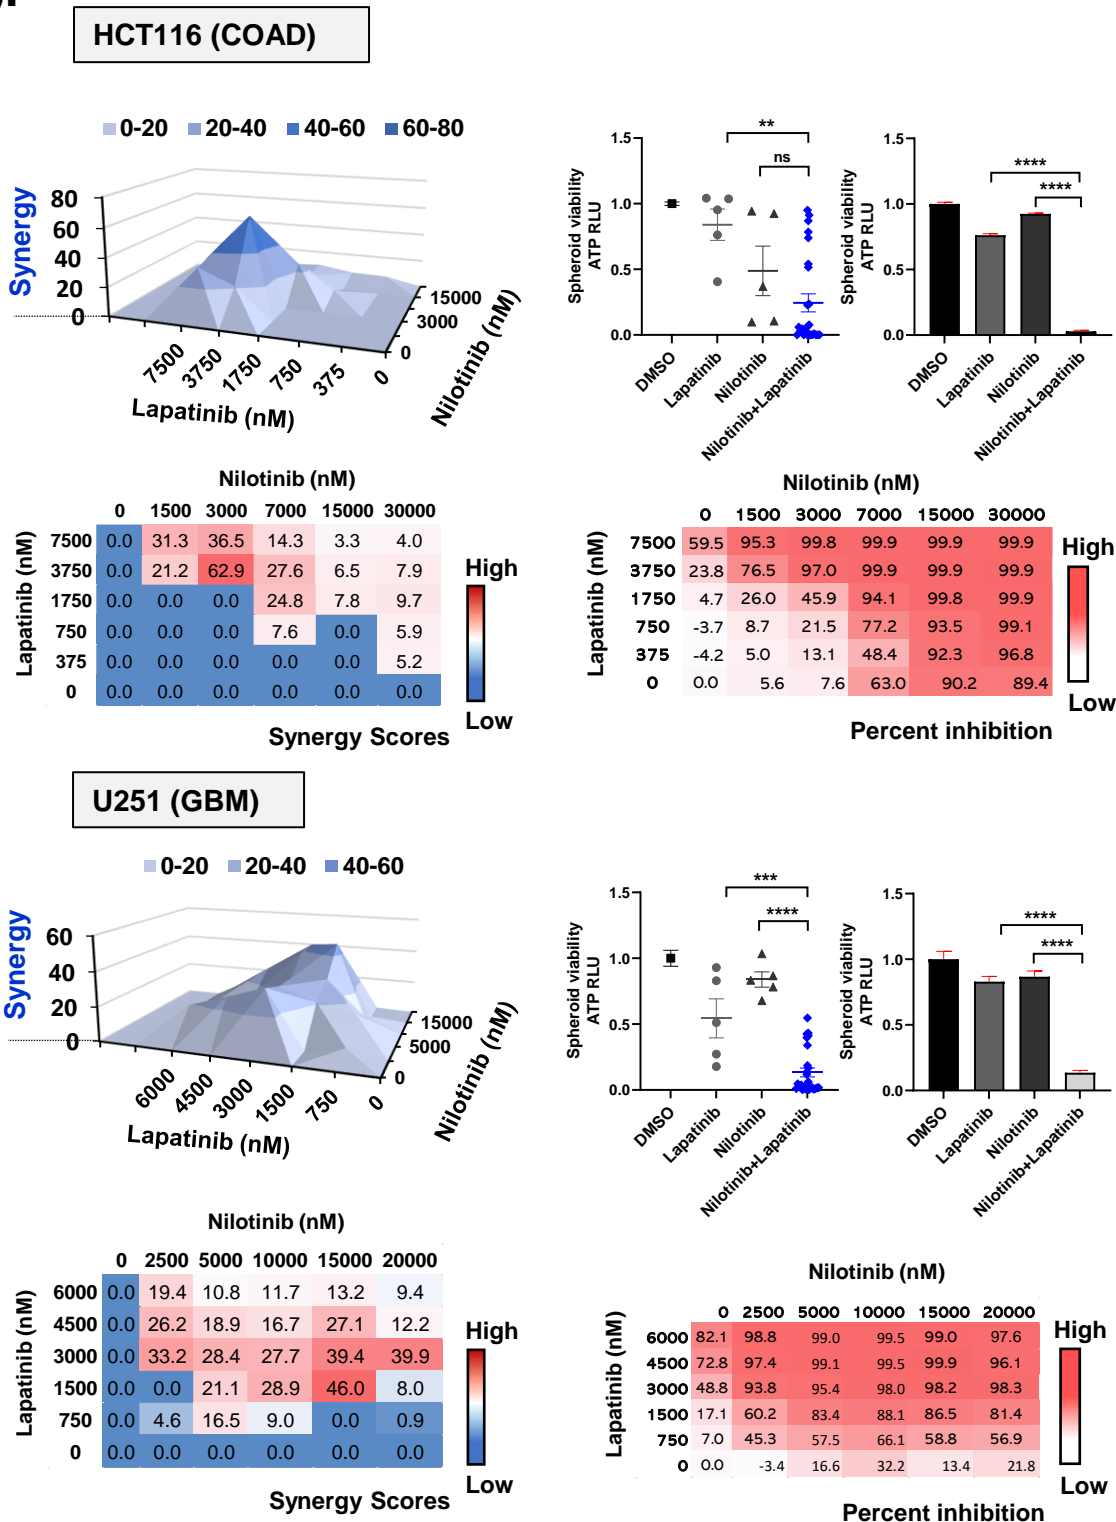

|           |           |           | Cumulative scores obtained |            | Max. Synergy obtained at: |            |               |
|-----------|-----------|-----------|----------------------------|------------|---------------------------|------------|---------------|
| Cell line | Drug 1    | Drug 2    | Synergy Score              | Antagonism | Drug 1                    | Drug 2     | Synergy score |
| HCT116    | Lapatinib | Nilotinib | 276.57                     | 0          | 3.75 $\mu$ M              | 3 $\mu$ M  | 62.9          |
| U251      | Lapatinib | Nilotinib | 469.3                      | 0          | 1.5 $\mu$ M               | 15 $\mu$ M | 45.96         |

**Supplementary Figure 5: (A), (B).** Matrix of synergy score values and a matrix of percent inhibition obtained for all 25 combination treatments in each of the respective synergy experiment performed. **(C).** Dot plots showing relative spheroid viability obtained for all 5 doses of each drug (administered as single agent), and for all 25 combination treatments done. Bar-graphs, showing the relative spheroid viability at combinatorial doses where synergy obtained was maximum. Table-2 states the cumulative synergy- and antagonism-scores obtained for all combinations tested (drugs with Lapatinib or Afatinib), the doses of drug1 and drug2 at which synergy was maximum, and maximum synergy score value for each of the combination tested (software used: MacSynergy-II). **(D).** Synergy plots for Lapatinib  $\pm$  Nilotinib, for HCT116 multi-spheroids cultured in N2EF media, and U251 multi-spheroids. Table (bottom) states the cumulative synergy- and antagonism- scores obtained. \*p < 0.05, \*\*p < 0.01, \*\*\*p < 0.001, \*\*\*\*p < 0.0001.

**(A).**

| Correlation analysis (Normal vs. Tumor) |        |                |                |                       |                |                 |                |                |                |                       |                |                 |                |
|-----------------------------------------|--------|----------------|----------------|-----------------------|----------------|-----------------|----------------|----------------|----------------|-----------------------|----------------|-----------------|----------------|
| S.No.                                   | Gene   | Normal (Colon) | Tumor (COAD)   | Normal (Brain Cortex) | Tumor (GBM)    | PanCancer Atlas |                | Normal (Colon) | Tumor (COAD)   | Normal (Brain Cortex) | Tumor GBM      | PanCancer Atlas |                |
| DDR1                                    |        |                |                |                       |                | KRAS            |                |                |                |                       |                |                 |                |
|                                         |        | R <sub>P</sub> | R <sub>P</sub> | R <sub>P</sub>        | R <sub>P</sub> | R <sub>P</sub>  | R <sub>S</sub> | R <sub>P</sub> | R <sub>P</sub> | R <sub>P</sub>        | R <sub>P</sub> | R <sub>P</sub>  | R <sub>S</sub> |
| 1                                       | EGFR   | -0.23          | 0.36           | 0.38                  | 0.41           | 0.25            | 0.35           | 0.18           | 0.18           | -0.06                 | 0.15           | 0               | 0.16           |
| 2                                       | IGF1R  | -0.68          | 0.34           | 0.18                  | 0.14           | 0.03            | 0.23           | -0.23          | 0.2            | 0.48                  | 0.34           | 0               | 0.04           |
| 3                                       | ERBB2  | 0.91           | 0.12           | 0.66                  | 0.43           | 0.04            | 0.29           | 0.59           | 0.022          | -0.12                 | 0.18           | 0.02            | 0.11           |
| 4                                       | ERBB3  | 0.89           | 0.51           | 0.63                  | 0.049          | -0.1            | 0.01           | 0.54           | 0.081          | -0.13                 | 0.13           | 0.05            | 0.12           |
| 5                                       | ERBB4  | -0.27          | -0.045         | -0.23                 | 0.39           | 0.24            | 0.31           | -0.13          | 0.062          | 0.7                   | 0.41           | 0.01            | 0.04           |
| 6                                       | KRAS   | 0.74           | 0.2            | -0.26                 | 0.32           | 0.01            | 0.12           | 1              | 1              | 1                     | 1              | 1               | 1              |
| 7                                       | BRAF   | -0.67          | 0.25           | -0.11                 | 0.36           | 0.13            | 0.21           | -0.37          | 0.24           | 0.89                  | 0.56           | 0.11            | 0.46           |
| 8                                       | PIK3CA | -0.55          | 0.33           | -0.019                | 0.24           | -0.05           | -0.01          | -0.15          | 0.34           | 0.71                  | 0.49           | 0.11            | 0.16           |
| 9                                       | MTOR   | -0.57          | 0.21           | 0.084                 | 0.52           | 0.02            | 0.08           | -0.31          | 0.22           | 0.52                  | 0.49           | 0.08            | 0.32           |
| 10                                      | SRC    | 0.48           | 0.33           | -0.077                | 0.2            | 0.04            | 0.14           | 0.4            | 0.22           | 0.6                   | 0.38           | 0.06            | 0.13           |
| 11                                      | LYN    | 0.29           | 0.1            | 0.25                  | 0.03           | -0.15           | -0.09          | 0.44           | 0.14           | 0.043                 | 0.18           | 0.07            | 0.22           |
| 12                                      | BCR    | -0.0056        | 0.24           | 0.0029                | 0.43           | 0.43            | 0.4            | 0.24           | 0.17           | 0.38                  | 0.37           | -0.02           | 0.05           |
| 13                                      | ABL1   | -0.66          | 0.36           | 0.79                  | 0.37           | 0.07            | 0.11           | -0.32          | 0.34           | -0.043                | 0.51           | -0.05           | -0.06          |
| 14                                      | ABL2   | -0.47          | 0.15           | 0.0041                | 0.033          | -0.09           | -0.09          | -0.13          | 0.19           | 0.77                  | 0.29           | 0               | 0.23           |
| 15                                      | SOX2   | -0.57          | 0.025          | 0.53                  | 0.56           | 0.48            | 0.09           | -0.32          | -0.029         | -0.1                  | 0.45           | 0               | 0.23           |
| 16                                      | SOX5   | -0.56          | 0.025          | 0.1                   | 0.3            | 0.58            | 0.31           | -0.24          | 0.086          | 0.42                  | 0.59           | 0.01            | 0.18           |
| 17                                      | SOX7   | -0.37          | -0.11          | 0.27                  | 0.18           | 0.17            | 0              | -0.094         | 0.082          | 0.085                 | 0.69           | -0.01           | 0.01           |
| 18                                      | SOX8   | -0.36          | 0.26           | 0.7                   | 0.19           | 0.01            | 0.02           | -0.27          | -0.0011        | -0.15                 | 0.35           | 0.02            | 0.07           |
| 19                                      | SOX9   | 0.84           | 0.22           | 0.55                  | 0.66           | 0.49            | 0.12           | 0.68           | 0.097          | -0.22                 | 0.4            | -0.04           | -0.18          |
| 20                                      | SOX10  | -0.53          | 0.0013         | 0.68                  | -0.01          | 0.29            | 0.34           | -0.36          | 0.073          | -0.18                 | 0.084          | 0.05            | 0.12           |
| 21                                      | POU5F1 | 0.51           | 0.17           | -0.0034               | 0.061          | -0.08           | 0.06           | 0.25           | -0.035         | 0.17                  | 0.01           | -0.08           | -0.04          |
| 22                                      | VANGL2 | -0.52          | 0.26           | 0.69                  | 0.59           | -0.09           | -0.06          | -0.22          | 0.26           | 0.023                 | 0.45           | 0.12            | 0.15           |
| 23                                      | LGR5   | 0.71           | 0.028          | 0.55                  | -0.14          | 0.46            | 0.43           | 0.58           | -0.0098        | -0.026                | 0.081          | 0.04            | 0.11           |
| 24                                      | APC    | -0.15          | 0.25           | -0.11                 | 0.51           | -0.03           | 0.14           | 0.22           | 0.39           | 0.58                  | 0.61           | 0.03            | 0.23           |
| 25                                      | CTNNB1 | 0.25           | 0.2            | 0.089                 | 0.37           | -0.03           | 0.09           | 0.62           | 0.079          | 0.76                  | 0.41           | 0.03            | 0.17           |
| 26                                      | CTNNA1 | 0.25           | 0.1            | 0.54                  | 0.66           | 0.08            | 0.18           | 0.51           | 0.29           | 0.43                  | 0.45           | 0.05            | 0.16           |
| 27                                      | CDH1   | 0.93           | 0.45           | 0.51                  | 0.35           | 0.07            | 0.25           | 0.81           | 0.26           | -0.064                | 0.26           | 0.05            | 0.19           |
| 28                                      | CDH2   | -0.31          | -0.061         | -0.14                 | 0.49           | 0.16            | -0.02          | -0.42          | 0.087          | -0.0027               | 0.4            | -0.04           | -0.19          |

**(B).**

|                |      | EGFR   | DDR1     | SRC    | LYN   | BCR      | CDH1     | LGR5     |      |  |
|----------------|------|--------|----------|--------|-------|----------|----------|----------|------|--|
| Colon (normal) | EGFR | 1      | 3.30E-05 | 0.15   | 0.84  | 0        | 2.00E-04 | 0.002    | EGFR |  |
|                | DDR1 | -0.23  | 1        | 0      | 0.31  | 1.60E-06 | 0        | 0        | DDR1 |  |
|                | SRC  | 0.082  | 0.48     | 1      | 0.17  | 0.56     | 1.80E-15 | 0        | SRC  |  |
|                | LYN  | -0.011 | 0.058    | -0.078 | 1     | 0.027    | 0.092    | 0.31     | LYN  |  |
|                | BCR  | 0.47   | -0.27    | 0.033  | 0.13  | 1        | 9.30E-07 | 2.30E-01 | BCR  |  |
|                | CDH1 | -0.21  | 0.93     | 0.43   | 0.096 | -0.28    | 1        | 0        | CDH1 |  |
|                | LGR5 | -0.18  | 0.71     | 0.48   | 0.058 | 0.064    | 6.80E-01 | 1        | LGR5 |  |

|      |      | EGFR   | DDR1    | SRC     | LYN    | BCR      | CDH1     | LGR5  |      |  |
|------|------|--------|---------|---------|--------|----------|----------|-------|------|--|
| COAD | EGFR | 1      | 1.3E-09 | 6.8E-06 | 0.05   | 0.000005 | 0.000002 | 0.68  | EGFR |  |
|      | DDR1 | 0.36   | 1       | 1.9E-08 | 0.097  | 0.000066 | 1.8E-15  | 0.64  | DDR1 |  |
|      | SRC  | 0.27   | 0.33    | 1       | 0.15   | 0.000044 | 0        | 0.64  | SRC  |  |
|      | LYN  | 0.12   | 0.1     | 0.087   | 1      | 1.2E-11  | 0.35     | 0.17  | LYN  |  |
|      | BCR  | 0.27   | 0.24    | 0.24    | 0.39   | 1        | 0.000017 | 0.77  | BCR  |  |
|      | CDH1 | 0.28   | 0.45    | 0.61    | -0.057 | 0.26     | 1        | 0.015 | CDH1 |  |
|      | LGR5 | -0.025 | 0.028   | 0.029   | -0.083 | -0.018   | 0.15     | 1     | LGR5 |  |

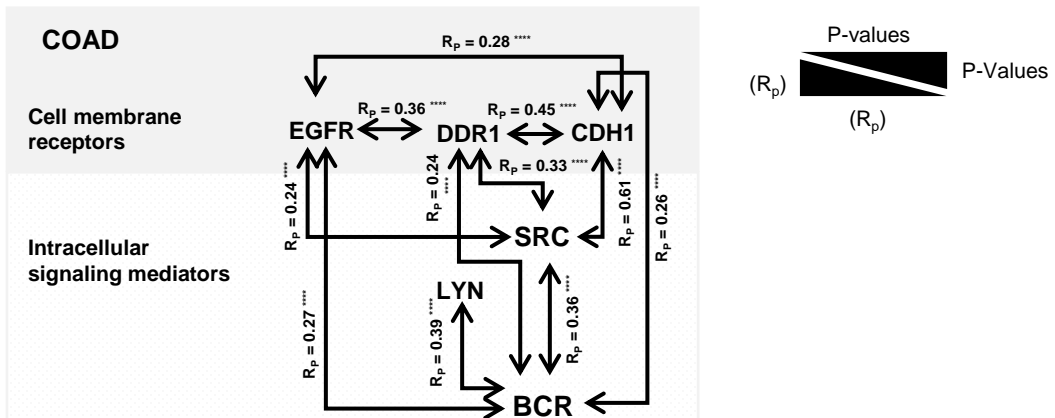



(C).

**STRING database**

Network: Physical interactions  
 Confidence level: High (score > 0.7)  
 MCL clustering (Inflation: 5)  
 Number of Nodes: 32  
 Number of edges: 112  
 PPI enrichment p-value: <1.0e-16  
 Edges within a cluster: Solid line  
 Edges between clusters: Dotted line

**Clusters**

Cluster 1 APC,AXIN1,CDH1,CTNNA1,CTNNB1,GSK3B,SOX2,SOX9  
 Cluster 2 ABL1,BCR,GAB1,GRB2,IRS1,LYN,SOS1  
 Cluster 3 EGF,EGFR,ERBB2,ERBB3,EREG,TGFA  
 Cluster 4 DDR1,PTPN11,SHC1  
 Cluster 5 DVL2,VANGL2  
 Cluster 6 BRAF,KRAS  
 Cluster 7 PIK3CA,SRC  
 Cluster 8 AKT1

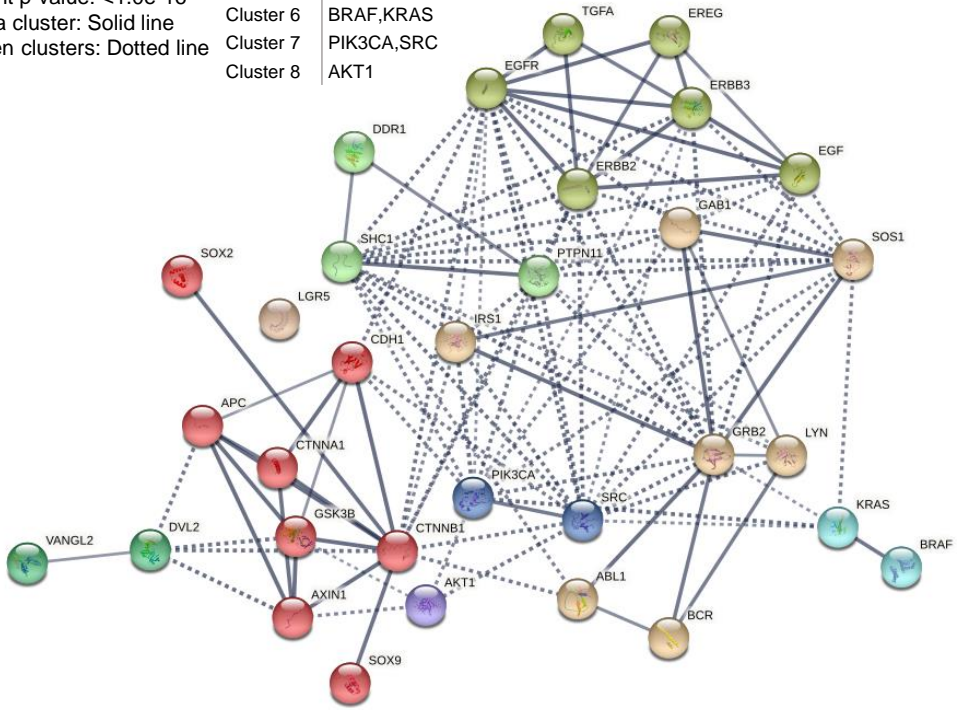

(D).

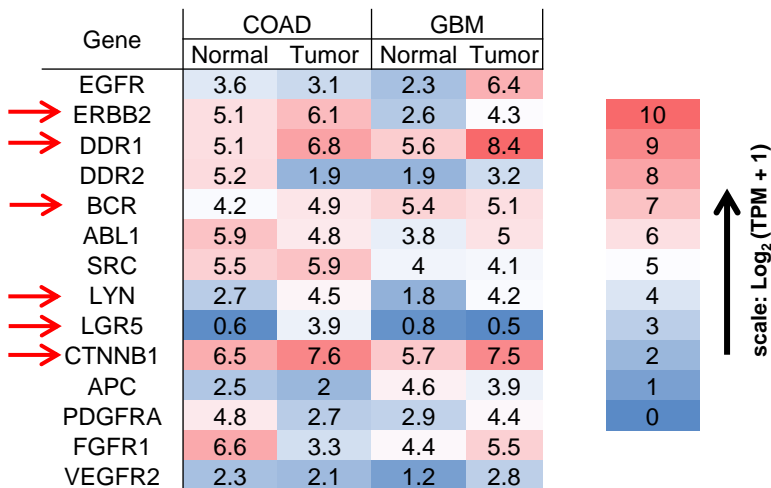

| Genes upregulated in tumors |                                                                   |
|-----------------------------|-------------------------------------------------------------------|
| COAD                        | ERBB2, DDR1, BCR, SRC, LYN, LGR5, CTNNB1                          |
| GBM                         | EGFR, ERBB2, DDR1, DDR2, ABL1, LYN, CTNNB1, PDGFRA, FGFR1, VEGFR2 |

(E).

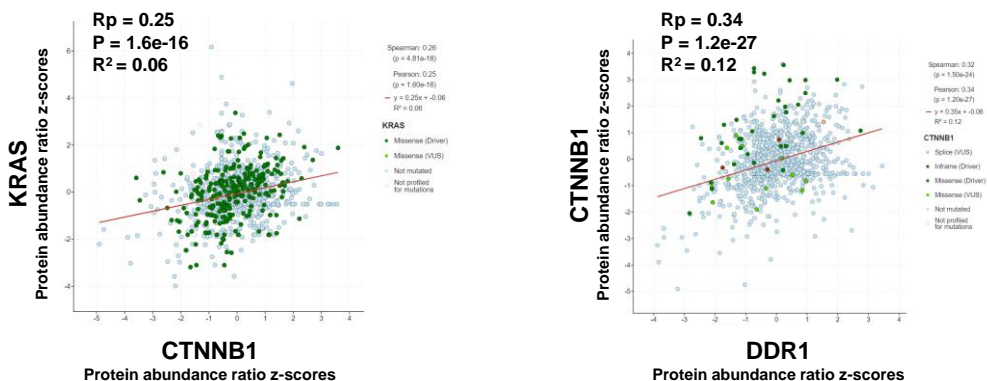

**Figure 5: (A).** Genomic associations of gene DDR1 with genes relating to other targets of the combinatorial (top-5) drug-leads identified. Datasets evaluated for tumors vs. normal, include colorectal adenocarcinoma (COAD), Glioblastoma (GBM), Colon (normal) and Brian cortex (normal) utilizing GEPIA; and Pan-Cancer Atlas using cBioPortal. All correlation coefficient values included are Pearson (Rp), except for TCGA pan-cancer atlas for which both Rp (Pearson) and Rs (Spearman) values were considered here due to intrinsic variability and heterogeneity among various tumor types. **(B).** Correlation matrix represents correlation coefficients, R-Pearson (Rp) obtained between the mRNA expression of each of the genes indicated on y-axis and the genes on x-axis (Source: GEPIA). **(C).** DDR1/BCR-ABL signaling networks using STRING database: The network (32 nodes and 112 edges), includes proteins reported to be engaging in physical interactions with high confidence (score > 0.7). Clustering performed utilizing MCL method revealed eight clusters listed at the top of the protein network. The clustering indicates SHC1 to be the adaptor protein that links DDR1 to other signaling pathways, including EGFR/ERBB2 and BCR-ABL complex which activate KRAS downstream; Interaction sources utilized in STRING database involved: Textmining, Experiments, Co-expression, Databases, Neighborhood, Co-occurrence (but, excluding gene-fusions). **(D).** Transcriptional expression values obtained using GEPIA for selective genes in datasets of COAD and GBM (Tumor vs. normal) represented in scale:  $\text{Log}_2(\text{TPM} + 1)$ . **(E).** Correlation between protein levels of CTNNB1 (beta-catenin), KRAS, and DDR1 in patient datasets available from curated non-redundant studies including TCGA Pan Cancer deposited at cBioPortal (graphs show ~ 950 patient samples from 202 independent studies) .

**(A).****HCT116 multi-spheroids**

|           |   |   |   |   |
|-----------|---|---|---|---|
| DMSO      | + | - | - | - |
| Lapatinib | - | + | - | + |
| GMB475    | - | - | + | + |

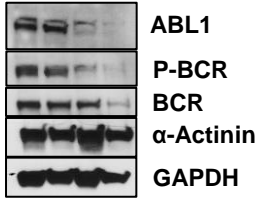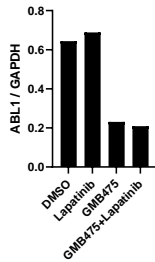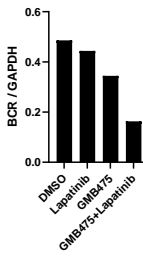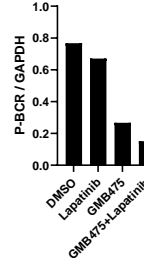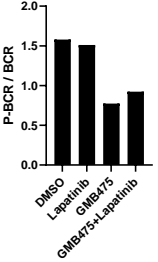**(B).****HCT116 cells****CaCo2 cells**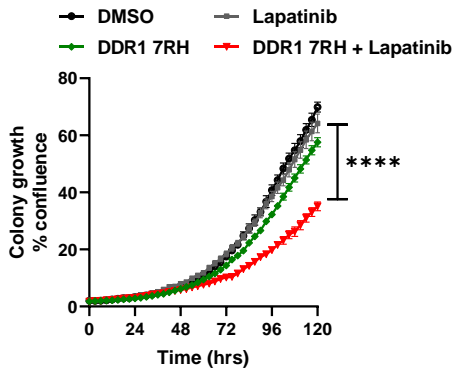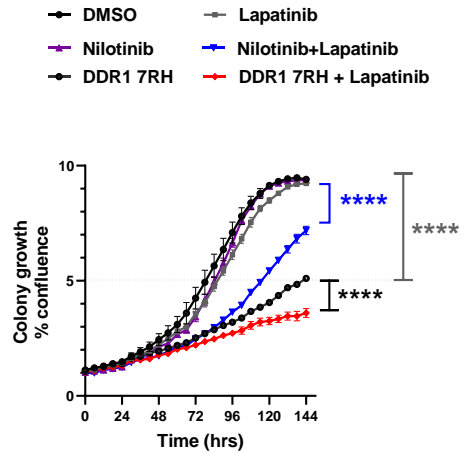**(C).****Late effect of drugs (administered on large spheroids)****(i) HCT116 (drugs administered to spheroids grown up to 90hrs)****(ii) U251 (drugs administered to spheroids grown up to day13)**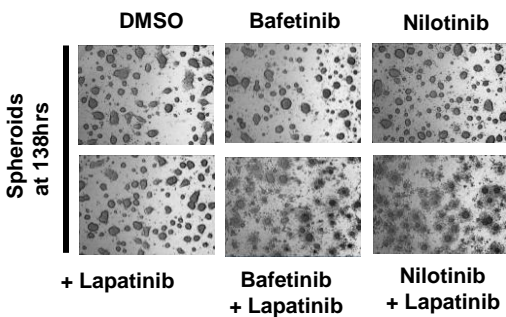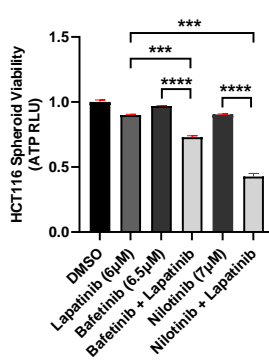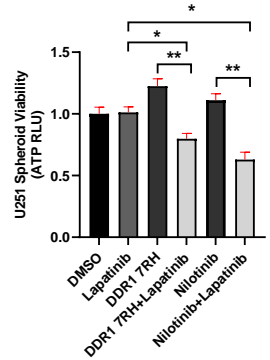

**Supplementary Figure 7: (A).** Western blots on HCT116 multi-spheroid lysates show reduction in levels of ABL1 protein and phospho-BCR upon administration of ABL1 PROTAC-inhibitor, GMB475, at 24hr post-treatment. Total BCR levels were also reduced upon combination treatment indicating that Lapatinib in combination with GMB475 at early time-points may also impact BCR gene regulation thereby altering not only signaling but also over all protein content in the cells. Actinin and GAPDH were used as loading controls. **(B).** Clonal cell proliferation assay performed using Incucyte for HCT116 and CaCo2 for drugs indicated. Nilotinib had better efficacy, when administered in combination with Lapatinib. DDR1 inhibition by 7RH drug was significantly cytotoxic both as single agent and in combination. P-values are indicated, \* $p < 0.05$ , \*\* $p < 0.01$ , \*\*\* $p < 0.001$ , \*\*\*\* $p < 0.0001$ . **(C).** Evaluation of late effects of drug treatment, by having the inhibitors administered on large (over-sized) spheroids. (i) HCT116 spheroids were cultured for 2 days, images were acquired at 48hrs, and then, continued to be grown till 90hrs (~day4), when drugs were administered. Spheroids were reimaged at 138hrs (~ day6), and then lysed for evaluation of viability. Bar-graph below shows significant reduction in combinations as compared to drugs administered alone. (ii) U251 spheroids were cultured till day 13, drugs were administered, and then, effect of drugs on spheroid viability was estimated at day15. Bar-graph shows significant reduction in combinations as compared to drugs administered alone (bar-graph).

(A).

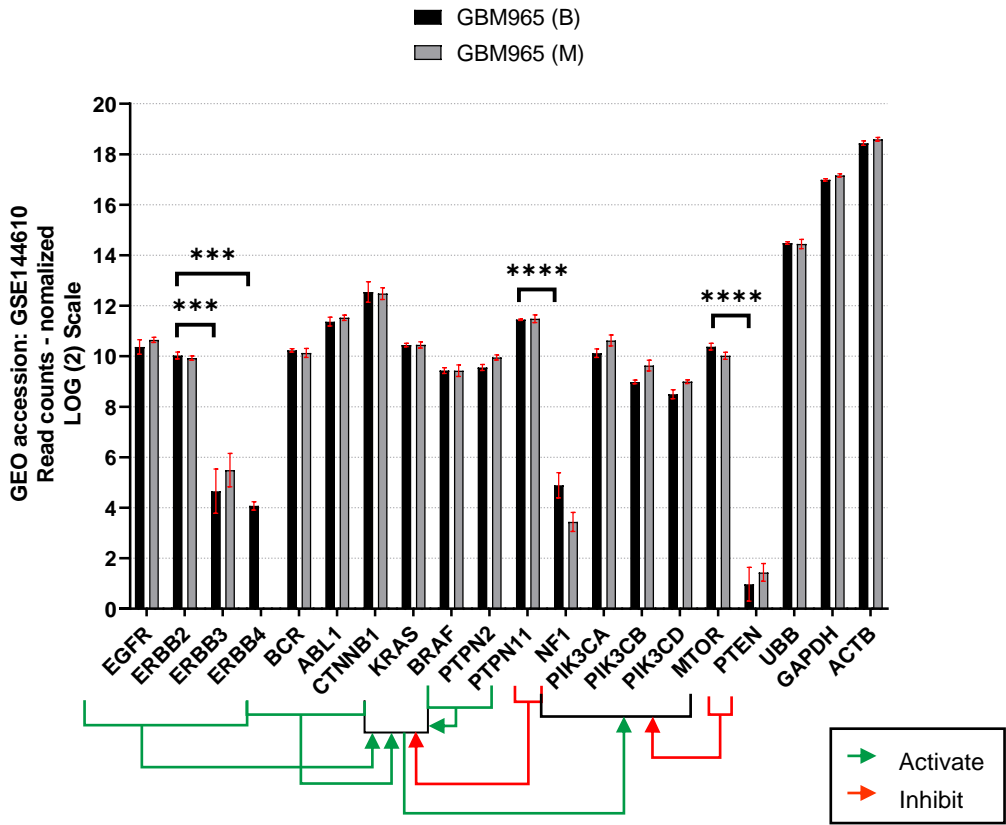

(B).

Fold difference in read counts (normalized)

|        |        |        |                                                             |
|--------|--------|--------|-------------------------------------------------------------|
| EGFR   | 3.26   | 3.82   | EGFR/ERBB2 inhibitor<br>(Lapatinib)                         |
| ERBB2  | 2.49   | 2.31   |                                                             |
| ERBB3  | 0.09   | 0.13   |                                                             |
| ERBB4  | 0.03   | 0.00   |                                                             |
| BCR    | 2.85   | 2.69   | DDR1/BCR-ABL1 MTK inhibitors<br>(Nilotinib)                 |
| ABL1   | 6.35   | 7.00   |                                                             |
| CTNNB1 | 15.37  | 13.87  | PIK3/MTOR dual kinase inhibitors<br>(Dactolisib, Paxalisib) |
| KRAS   | 3.31   | 3.34   |                                                             |
| BRAF   | 1.65   | 1.67   |                                                             |
| PTPN2  | 1.79   | 2.36   |                                                             |
| PTPN11 | 6.61   | 6.85   |                                                             |
| → NF1  | 0.08   | 0.03   |                                                             |
| PIK3CA | 2.67   | 3.82   |                                                             |
| PIK3CB | 1.20   | 1.92   |                                                             |
| PIK3CD | 0.87   | 1.21   |                                                             |
| MTOR   | 3.17   | 2.48   |                                                             |
| → PTEN | 0.01   | 0.01   |                                                             |
| UBB    | 54.19  | 53.75  |                                                             |
| GAPDH  | 307.28 | 347.61 |                                                             |
| ACTB   | 844.13 | 937.11 |                                                             |

Legend:   
█ Fold change > 1 (Fold increase in average counts)   
█ Fold change < 1 (Fold decrease in average counts)   
 Fold change = 1 (Average read counts = 433)

GBM965 (B)   
 GBM965 (M)

**Supplementary Figure 8: (A).** Bar-graphs showing normalized read counts (Scale:  $\text{Log}_2$ ) for patient derived GBM line, GBM965 (Gene expression dataset used: GSE144610). The transcriptional expression of proteins that positively activate KRAS (EGFR/ERBB2, BCR-ABL1, CTNNB1, PTPN2, PTPN11) were upregulated, while the negative regulator of KRAS (NF1) had lower expression. Additionally, KRAS downstream targets like, BRAF, PIK3CA, MTOR were upregulated, and the negative regulator of PIK3/AKT pathway, the tumor suppressor PTEN had lower expression reads ( $***p < 0.001$ ,  $****p < 0.0001$ ). **(B).** Fold difference between reads (counts-normalized) for every gene with respect to the average number of transcriptional reads (average counts-normalized) observed in the entire dataset. The data is presented along with expression values of three house-keeping genes (ACTB, beta-actin; Glyceraldehyde 3-phosphate dehydrogenase, GAPDH; Ubiquitin, UBB). Key: GBM965 (B), GBM965 unsorted bulk cells; GBM965 (M), GBM965 sorted for having migratory potential.
