# Supplementary material for: Identification of Synergistic Drug Combinations to Target KRAS-Driven Chemoradioresistant Cancers Utilizing Tumoroid Models of Colorectal Adenocarcinoma and Recurrent Glioblastoma
Source: Front Oncol. 2022 May 18;12:840241. doi: 10.3389/fonc.2022.840241 (PMC9158132; doi:10.3389/fonc.2022.840241)
Supplement: Supplementary file 3 [file Table_1.xlsx]

## Sheet: S1.1_List of inhibitors
INDEX	PATHWAYS	INHIBITOR	SYNONYMS	PURCHASED FROM	CAS	SMILES	FORMULA	MOLECULAR WEIGHT	TARGET	FDA APPROVAL	REFERENCES
1	EGFR	Afatinib	BIBW2992	Target Mol	439081-18-2	CN(C)C\C=C\C(=O)Nc1cc2c(Nc3ccc(F)c(Cl)c3)ncnc2cc1O[C@H]1CCOC1	C24H25ClFN5O3	485.94	EGFR (L858R); EGFR (L858R/T790M); EGFR (WT); HER2; HER4	Yes	Li D, et al. BIBW2992, an irreversible EGFR/HER2 inhibitor highly effective in preclinical lung cancer models. Oncogene. 2008 Aug 7;27(34):4702-11.
2		Lapatinib	GW572016;GSK572016	Target Mol	231277-92-2	CS(=O)(=O)CCNCc1ccc(o1)-c1ccc2ncnc(Nc3ccc(OCc4cccc(F)c4)c(Cl)c3)c2c1	C29H26ClFN4O4S	581.06	EGFR; HER2/ErbB2	Yes	Rusnak DW, et al. The effects of the novel, reversible epidermal growth factor receptor/ErbB-2 tyrosine kinase inhibitor, GW2016, on the growth of human normal and tumor-derived cell lines in vitro and in vivo. Mol Cancer Ther. 2001 Dec;1(2):85-94
3		Sapitinib	AZD-8931	Target Mol	848942-61-0	CNC(=O)CN1CCC(CC1)Oc1cc2c(Nc3cccc(Cl)c3F)ncnc2cc1OC	C23H25ClFN5O3	473.93	EGFR; HER2/ErbB2, HER3/ErbB3	Yes	Hickinson DM, et al. Clin Cancer Res, 2010, 16(4), 1159-1169.
4	WNT	XAV939	XAV 939;XAV-939;NVP-XAV939	Target Mol	284028-89-3	FC(F)(F)c1ccc(cc1)-c1nc2CCSCc2c(=O)[nH]1	C14H11F3N2OS	312.31	Tankyrase (TNKS1/2)	Preclinical studies	Dregalla RC, et al. Regulatory roles of tankyrase 1 at telomeres and in DNA repair: suppression of T-SCE and stabilization of DNA-PKcs. Aging (Albany NY). 2010 Oct;2(10):691-708.
5		ICG001	PRI-724;PRI-724 isomer	Target Mol	847591-62-2	Oc1ccc(C[C@@H]2N3[C@H](CN(Cc4cccc5ccccc45)C2=O)N(CCC3=O)C(=O)NCc2ccccc2)cc1	C33H32N4O4	548.63	Binds to CBP, and disrupts CBP/β-catenin mediated transcription.	In Clinical trials	Sasaki T, et al. Transl Respir Med. 2:8.
6		BC2059		Target Mol	1227637-23-1	C[C@H]1C[C@@H](C)CN(C1)S(=O)(=O)c1ccc2\C(=N/O)c3ccc(cc3\C(=N/O)c2c1)S(=O)(=O)N1C[C@@H](C)C[C@@H](C)C1	C28H36N4O6S2	588.7	Disrupts the binding of β-catenin with the scaffold protein transducin β-like 1 (TBL1)	Preclinical studies	Savvidou I, Khong T, Cuddihy A, et al. Beta-catenin inhibitor BC2059 is efficacious as monotherapy or in combination with proteasome inhibitor bortezomib in multiple myeloma[J]. Molecular Cancer Therapeutics, 2017, 16(9):molcanther.0624.2016.
7		FZ7-21	Ac-LPSDDLEFWCHVMY-amide	Target Mol				1794.8	Inhibits WNT receptor FZD7	Preclinical studies	Nile AH, de Sousa E Melo F, Mukund S, Piskol R, Hansen S, Zhou L, et al. A selective peptide inhibitor of Frizzled 7 receptors disrupts intestinal stem cells. Nat Chem Biol. 2018 Jun;14(6):582-590. doi: 10.1038/s41589-018-0035-2. Epub 2018 Apr 9. Erratum in: Nat Chem Biol. 2018 May 4;: PMID: 29632413.
8		Salinomycin sodium salt	Salinomycin sodium	Target Mol	55721-31-8	[H][C@]1([C@](C)(CC2)O[C@]32[C@](O)C=C[C@]4(O[C@]([H])([C@@H](CC)C([C@@H](C)[C@@H](O)[C@](C)[C@]5([H])O[C@]([C@@H](CC)C([O-])=O)([H])CC[C@@H]5C)=O)[C@@H](C)C[C@]4C)O3)CC[C@@](CC)(O)[C@](C)O1.[Na+]	C42H65NaO11	772.98	LRP6/Wnt pathway, Stemness, ABC transporter, VEGFR, AKT/mTOR. K+ channel opener.	Preclinical studies	Zhou J, et al. Salinomycin induces apoptosis in cisplatin-resistant colorectal cancer cells by accumulation of reactiveoxygen species. Toxicol Lett. 2013 Oct 24;222(2):139-45.
9	PI3K/mTOR	Idelasilib	GS-1101;CAL-101	Target Mol	870281-82-6	CC[C@H](Nc1ncnc2nc[nH]c12)c1nc2cccc(F)c2c(=O)n1-c1ccccc1	C22H18FN7O	415.42	PI3K (p110δ/γ)	Yes	Lannutti BJ, et al. CAL-101, a p110delta selective phosphatidylinositol-3-kinase inhibitor for the treatment of B-cell malignancies, inhibits PI3K signaling and cellular viability. Blood. 2011 Jan 13;117(2):591-4.
10		Buparlisib	BKM120;NVP-BKM120	Target Mol	944396-07-0	Nc1cc(c(cn1)-c1cc(nc(n1)N1CCOCC1)N1CCOCC1)C(F)(F)F	C18H21F3N6O2	410.39	PI3K (p110α/β/γ/δ), PI3K (Vps34)	In Clinical trials	Burger MT, et al. Identification of NVP-BKM120 as a Potent, Selective, Orally Bioavailable Class I PI3 Kinase Inhibitor for Treating Cancer. ACS Med Chem Lett. 2011 Aug 26;2(10):774-9.
11		Paxalisib	GDC 0084;GDC-0084;RG7666	Target Mol	1382979-44-3	c1c(cnc(n1)N)c1nc2c(c(n1)N1CCOCC1)nc1n2CCOC1(C)C	C18H22N8O2	382.19	mTOR, PI3K (p110α/β/γ/δ)	Yes	Heffron TP, et al. ACS Med Chem Lett. 2016, 7(4):351-6.
12		Dactolisib	NVP-BEZ235;BEZ235	Target Mol	915019-65-7	Cn1c2cnc3ccc(cc3c2n(-c2ccc(cc2)C(C)(C)C#N)c1=O)-c1cnc2ccccc2c1	C30H23N5O	469.54	mTOR (p70S6K), PI3K (p110α/γ/δ), ATR	In Clinical trials	Maira SM, et al. Identification and characterization of NVP-BEZ235, a new orally available dual phosphatidylinositol 3-kinase/mammalian target of rapamycin inhibitor with potent in vivo antitumor activity. Mol Cancer Ther. 2008 Jul;7(7):1851-63.
13	MAPK (KRAS)	AMG510		Target Mol	2296729-00-3	CC(C)c1nccc(C)c1-n1c2nc(c(F)cc2c(nc1=O)N1CCN(C[C@@H]1C)C(=O)C=C)-c1c(O)cccc1F	C30H30F2N6O3	560.59	KRAS G12C	In Clinical trials	Karen Rex, et al. Abstract 3090: In vivo characterization of AMG 510 - a potent and selective KRASG12Ccovalent small molecule inhibitor in preclinical KRASG12Ccancer models. Experimental and Molecular Therapeutics.
14		MRTX849		Target Mol	2326521-71-3	CN1CCC[C@H]1COc1nc2CN(CCc2c(n1)N1CCN([C@@H](CC#N)C1)C(=O)C(F)=C)c1cccc2cccc(Cl)c12	C32H35ClFN7O2	604.12	KRAS G12C	In Clinical trials	Jill Hallin , Lars D Engstrom , Lauren Hargis.The KRAS G12C Inhibitor MRTX849 Provides Insight Toward Therapeutic Susceptibility of KRAS-Mutant Cancers in Mouse Models and Patients.Cancer Discov. 2020 Jan;10(1):54-71.
15	MAPK (RAF)	PLX8394		Target Mol	1393466-87-9	F[C@@H]1CCN(C1)S(=O)(=O)Nc1ccc(F)c(C(=O)c2c[nH]c3ncc(cc23)-c2cnc(nc2)C2CC2)c1F	C25H21F3N6O3S	542.54	RAF, BRAFV600E	Preclinical studies	Basile KJ, Le K, Hartsough EJ, Aplin AE. Inhibition of mutant BRAF splice variant signaling by next-generation, selective RAF inhibitors. Pigment Cell Melanoma Res. 2014 May;27(3):479-84. doi: 10.1111/pcmr.12218. Epub 2014 Feb 10. PMID: 24422853; PMCID: PMC3988223.
											Koumaki K, Kontogianni G, Kosmidou V, Pahitsa F, Kritsi E, Zervou M et al. BRAF paradox breakers PLX8394, PLX7904 are more effective against BRAFV600Ε CRC cells compared with the BRAF inhibitor PLX4720 and shown by detailed pathway analysis. Biochim Biophys Acta Mol Basis Dis. 2021 Apr 1;1867(4):166061. doi: 10.1016/j.bbadis.2020.166061. Epub 2020 Dec 29. PMID: 33385518.
16		Belvarafenib		Target Mol	1446113-23-0	Cc1ccc2c(Nc3cccc(Cl)c3F)nccc2c1NC(=O)c1csc2c(N)ncnc12	C23H16ClFN6OS	478.9	Pan-Raf	In Clinical trials	Son J B , Jung S H , Choi Ii W , et al. Thieno[3,2-d]pyrimidine derivatives having inhibitory activity on protein kinases[J]. 2015.
17		MLN2480	BIIB-024;TAK-580	Target Mol	1096708-71-2	Nc1ncnc(C(=O)N[C@H](C)c2ncc(C(=O)Nc3ncc(Cl)c(C(F)(F)F)c3)s2)c1Cl	C17H12Cl2F3N7O2S	506.29	Pan-Raf	In Clinical trials	Elizabeth Grace Carideo Cunniff, et al. Use of combination treatment with the investigational RAF kinase inhibitor MLN2480 and the investigational MEK kinase inhibitor TAK-733 on the growth of BRAF-mutant and RAS-mutant preclinical models of melanoma and CRC Journal of Clinical Oncology. 2013:e13529.
18	Multi-tyrosine kinase	Bafetinib	NS-187;INNO-406	Target Mol	859212-16-1	CN(C)[C@H]1CCN(Cc2ccc(cc2C(F)(F)F)C(=O)Nc2ccc(C)c(Nc3nccc(n3)-c3cncnc3)c2)C1	C30H31F3N8O	576.62	Abl, Src/Lyn, DDR1	In Clinical trials	Kimura S, Naito H, Segawa H, Kuroda J, Yuasa T, Sato K, et al. NS-187, a potent and selective dual Bcr-Abl/Lyn tyrosine kinase inhibitor, is a novel agent for imatinib-resistant leukemia. Blood. 2005 Dec 1;106(12):3948-54. doi: 10.1182/blood-2005-06-2209. Epub 2005 Aug 16. PMID: 16105974.
19		Sorafenib	Bay 43-9006	Target Mol	284461-73-0	CNC(=O)c1cc(Oc2ccc(NC(=O)Nc3ccc(Cl)c(c3)C(F)(F)F)cc2)ccn1	C21H16ClF3N4O3	464.83	c-Kit; FLT3; mPDGFRβ; PDGFRβ; B-Raf; B-Raf (V599E); Raf-1; VEGFR2/Flk2	Yes	Wilhelm SM, Carter C, Tang L, Wilkie D, McNabola A, Rong H, et al. BAY 43-9006 exhibits broad spectrum oral antitumor activity and targets the RAF/MEK/ERK pathway and receptor tyrosine kinases involved in tumor progression and angiogenesis. Cancer Res. 2004 Oct 1;64(19):7099-109. doi: 10.1158/0008-5472.CAN-04-1443. PMID: 15466206.
20		Ponatinib	AP24534	Target Mol	943319-70-8	CN1CCN(Cc2ccc(NC(=O)c3ccc(C)c(c3)C#Cc3cnc4cccnn34)cc2C(F)(F)F)CC1	C29H27F3N6O	532.56	Abl; c-Kit; FGFR1; PDGFRα; VEGFR2, c-Src; DDR1	Yes	O'Hare T, Shakespeare WC, Zhu X, Eide CA, Rivera VM, Wang F, et al. AP24534, a pan-BCR-ABL inhibitor for chronic myeloid leukemia, potently inhibits the T315I mutant and overcomes mutation-based resistance. Cancer Cell. 2009 Nov 6;16(5):401-12. doi: 10.1016/j.ccr.2009.09.028. PMID: 19878872; PMCID: PMC2804470.
21		Midostaurin	CGP 41251;PKC412;CGP41231;N-Benzoylstaurosporine	Target Mol	120685-11-2	CO[C@@H]1[C@@H](C[C@@H]2O[C@]1(C)n1c3ccccc3c3c4CNC(=O)c4c4c5ccccc5n2c4c13)N(C)C(=O)c1ccccc1	C35H30N4O4	570.64	PPK; PKCα; PKCβ1; PKCβ2; PKCγ	Yes	Fabbro D, Buchdunger E, Wood J, Mestan J, Hofmann F, Ferrari S, et al. Inhibitors of protein kinases: CGP 41251, a protein kinase inhibitor with potential as an anticancer agent. Pharmacol Ther. 1999 May-Jun;82(2-3):293-301. doi: 10.1016/s0163-7258(99)00005-4. PMID: 10454207.
22		Nilotinib	AMN107	Target Mol	641571-10-0		C28H22F3N7O	529.52	DDR1, BCR-ABL, ABL1	Yes	O'Hare T, Walters DK, Stoffregen EP, Jia T, Manley PW, Mestan J, Cowan-Jacob SW, Lee FY, Heinrich MC, Deininger MW, Druker BJ. In vitro activity of Bcr-Abl inhibitors AMN107 and BMS-354825 against clinically relevant imatinib-resistant Abl kinase domain mutants. Cancer Res. 2005 Jun 1;65(11):4500-5. doi: 10.1158/0008-5472.CAN-05-0259. PMID: 15930265.
											Giles, Frank. (2009). Nilotinib: optimal therapy for patients with chronic myeloid leukemia and resistance or intolerance to imatinib. Drug Design, Development and Therapy. 89. 10.2147/DDDT.S3069.
23		Dasatinib	BMS-354825	Target Mol	302962-49-8		C22H26ClN7O2S	488.01	DDR1, Bcr-Abl and Src family	Yes	O'Hare T, Walters DK, Stoffregen EP, Jia T, Manley PW, Mestan J, Cowan-Jacob SW, Lee FY, Heinrich MC, Deininger MW, Druker BJ. In vitro activity of Bcr-Abl inhibitors AMN107 and BMS-354825 against clinically relevant imatinib-resistant Abl kinase domain mutants. Cancer Res. 2005 Jun 1;65(11):4500-5. doi: 10.1158/0008-5472.CAN-05-0259. PMID: 15930265.
24		Imatinib	STI571, CGP057148B, ST-1571, STI571, ST-1571, CGP057148B	Target Mol	152459-95-5		C29H31N7O	493.6	DDR1, c-Abl, Bcr-Abl, PDGFR, c-Kit	Yes
25	NTRKs	TPX0005	TPX 0005;TPX-0005;Repotrectinib	Target Mol	1802220-02-5	Fc1cc2[C@@H](C)Nc3nc4c(cnn4cc3)C(=O)NC[C@@H](Oc2cc1)C	C18H18FN5O2	355.37	ALK/ROS1/NTRK 1/2/3 inhibitor	Preclinical studies	Dayong Zhai, et al. Abstract 2132: The novel, rationally-designed, ALK/SRC inhibitor TPX-0005 overcomes multiple acquired resistance mechanisms to current ALK inhibitors. Cancer Research. July 2016
26		Selintrectinib	LOXO-195	Target Mol	2097002-61-2	C[C@@H]1CCc2ncc(F)cc2[C@H]2CCCN2c2ccn3ncc(c3n2)C(=O)N1	C20H21FN6O	380.42	NTRK 1/3 inhibitor	Preclinical studies	Drilon A , Nagasubramanian R , Blake J F , et al. A Next-Generation TRK Kinase Inhibitor Overcomes Acquired Resistance to Prior TRK Kinase Inhibition in Patients with TRK Fusion-Positive Solid Tumors[J]. Cancer Discovery, 2017, 7(9):CD-17-0507.
27		VU6015929		Target Mol		Cn1ccc(-c2cncc(CNc3cc(C(=O)Nc4cccc(OC(F)(F)F)c4)ccc3F)c2)n1	C24H19F4N5O2	485.4	DDR1 (NTRK4), DDR2	Preclinical studies	Jeffries DE, Borza CM, Blobaum AL,et al.Discovery of VU6015929: A Selective Discoidin Domain Receptor 1/2 (DDR1/2) Inhibitor to Explore the Role of DDR1 in Antifibrotic Therapy[1].ACS Med Chem Lett. 2019 Nov 25 ;11(1):29-33.
28		DDR1 7rh	DDR1-IN-2	Target Mol	1429617-90-2	CCc1ccc(cc1C#Cc1cnc2ccnn2c1)C(=O)Nc1cc(CN2CCN(C)CC2)cc(c1)C(F)(F)F	C30H29F3N6O	546.59	DDR1 (NTRK4)	Preclinical studies	Gao M, et al. Discovery and optimization of 3-(2-(Pyrazolo[1,5-a]pyrimidin-6-yl)ethynyl)benzamides as novel selective and orally bioavailable discoidin domain receptor 1 (DDR1) inhibitors. J Med Chem. 2013 Apr 25;56(8):3281-95.
29	Developmental pathways	Crenigacetate	LY3039478	Target Mol	1421438-81-4	C[C@@H](C(=O)N[C@H]1c2ccccc2c2c(nccc2)N(C1=O)CCO)NC(=O)CCC(F)(F)F	C22H23F3N4O4	464.44	Gamma-secretase inhibitor (Notch1)	In Clinical trials	Eli Lilly Company. The 8th SCI-RSC Symposium on Proteinase Inhibitor Design. 2013.
30		GANT61	NSC 136476	Target Mol	500579-04-4	C1(N(CCCN1Cc1c(N(C)C)cccc1)Cc1c(N(C)C)cccc1)c1ccncc1	C27H35N5	429.6	Hedgehog/Smoothened inhibitor (GLI)	Preclinical studies	Lauth M, et al. Proc Natl Acad Sci, 2007, 104(20), 8455-8560
31		Itraconazole	R51211	Target Mol	84625-61-6	CCC(C)n1ncn(-c2ccc(cc2)N2CCN(CC2)c2ccc(OC[C@H]3CO[C@@](Cn4cncn4)(O3)c3ccc(Cl)cc3Cl)cc2)c1=O	C35H38Cl2N8O4	705.63	Antifungal (P450 (CYP3A4)), mTOR, Hhg	Yes	Isoherranen N, et al. Drug Metab Dispos, 2004, 32(10), 1121-1131.
32		BQ123	BQ 123;BQ-123	Target Mol	136553-81-6	[H][C@@]12CCCN1C(=O)[C@@H](CC(O)=O)NC(=O)[C@@H](CC1=CNC3=C1C=CC=C3)NC(=O)[C@H](CC(C)C)NC(=O)[C@H](NC2=O)C(C)C	C31H42N6O7	610.7	Endothelin A receptor antagonist	Preclinical studies	Ihara M, et al. J Cardiovasc Pharmacol. 1992, 12, S11-14.
33		Verteporfin	CL 318952;BPD-MA	Target Mol	129497-78-5	COC(=O)CCc1c(C)c2cc3[nH]c(cc4nc(cc5[nH]c(cc1n2)c(CCC(O)=O)c5C)c(C=C)c4C)C1=CC=C([C@@H](C(=O)OC)[C@@]31C)C(=O)OC.COC(=O)CCc1c(C)c2cc3nc(cc4[nH]c(cc5nc(cc1[nH]2)c(CCC(O)=O)c5C)[C@]1(C)[C@H](C(=O)OC)C(=CC=C41)C(=O)OC)c(C)c3C=C	C41H42N4O8	718.79	Inhibits YAP/TAZ (Hippo signaling)	Preclinical studies	Schmidt-Erfurth U, et al. Surv Ophthalmol, 2000, 45(3), 195-214.
34	Epigenetic regulators	Decitabine	5-Aza-2'-deoxycytidine;NSC 127716;Deoxycytidine;Dacogen	Target Mol	2353-33-5	Nc1ncn([C@H]2C[C@H](O)[C@@H](CO)O2)c(=O)n1	C8H12N4O4	228.21	DNA methyltransferase (DNMT)	Yes	Shaker S, et al. Preclinical evaluation of antineoplastic activity of inhibitors of DNA methylation (5-aza-2'-deoxycytidine) and histone deacetylation (trichostatin A, depsipeptide) in combination against myeloid leukemic cells. Leuk Res. 2003 May;27(5):437-44.
35		JQ1	JQ1	Target Mol	1268524-70-4	Cc1sc-2c(c1C)C(=N[C@@H](CC(=O)OC(C)(C)C)c1nnc(C)n-21)c1ccc(Cl)cc1	C23H25ClN4O2S	456.99	BET-domain inhibitor (BRD4 (1/2))	Preclinical studies	Filippakopoulos P, et al. Selective inhibition of BET bromodomains. Nature. 2010 Dec 23;468(7327):1067-73.
36		Vorinostat	SAHA;MK0683;suberoylanilide hydroxamic acid	Target Mol	149647-78-9	ONC(=O)CCCCCCC(=O)Nc1ccccc1	C14H20N2O3	264.32	HDAC; HDAC1;HDAC2;HDAC3;HDAC6;HDAC8	Yes	Hrzenjak A et al. Histone deacetylase inhibitor vorinostat suppresses the growth of uterine sarcomas in vitro and in vivo. Mol Cancer. 2010 Mar 4;9:49.
37	SRC kinase	KB-SRC-4		TOCRIS	1380088-03-8	NC1=C2C(N(C4=CC=CC(C5=CN=NN5CC6=CC(C7=CC=CC=C7)=CC=C6)=C4)N=C2C3=CC=C(Cl)C=C3)=NC=N1	C32H23ClN8	555.03	SRC kinase	Preclinical studies	Brandvold KR, Steffey ME, Fox CC, Soellner MB. Development of a highly selective c-Src kinase inhibitor. ACS Chem Biol. 2012 Aug 17;7(8):1393-8. doi: 10.1021/cb300172e. Epub 2012 Jun 4. PMID: 22594480; PMCID: PMC3423592.
38	BCR-ABL	GMB-475	BCR-ABL1 kinase PROTAC®	TOCRIS	2490599-18-1	O=C(N[C@@H](C(C)(C)C)C(N1C[C@@H](C[C@H]1C(NCC2=CC=C(C3=C(N=CS3)C)C=C2)=O)O)=O)COCCOC4=CC=C(C5=CC(NC6=CC=C(OC(F)(F)F)C=C6)=NC=N5)C=C4	C43H46F3N7O7S	861.94	BCR-ABL	Preclinical studies	Burslem GM, Schultz AR, Bondeson DP, Eide CA, Savage Stevens SL, Druker BJ, Crews CM. Targeting BCR-ABL1 in Chronic Myeloid Leukemia by PROTAC-Mediated Targeted Protein Degradation. Cancer Res. 2019 Sep 15;79(18):4744-4753. doi: 10.1158/0008-5472.CAN-19-1236. Epub 2019 Jul 16. PMID: 31311809; PMCID: PMC6893872.
											Li, X., Song, Y. Proteolysis-targeting chimera (PROTAC) for targeted protein degradation and cancer therapy. J Hematol Oncol 13, 50 (2020).

## Sheet: S1.2_Drug screening (HCT116)
INDEX	PATHWAYS	INHIBITOR	TARGET	FDA APPROVAL	~ IC50 (µM)	Relative Potency Ratio	~ Inhibitor concentration (µM) used to in combination (Drug ± Lapatinib)	Average of % Inhibition obtained in preliminary drug screening in HCT116 spheroids
					HCT116 Spheroids	IC50 (Drug / EGFRi)	HCT116 Spheroids	Drugs alone	Drugs + EGFRi
1	EGFR	Afatinib	EGFR (L858R); EGFR (L858R/T790M); EGFR (WT); HER2; HER4	Yes	12		6	7.74715	NA		Key:
2		Lapatinib	EGFR; HER2/ErbB2	Yes	12		6	6.9611	NA		Averaged % inhibition obtained with Drugs + EGFRi administered, include:
3		Sapitinib	EGFR; HER2/ErbB2, HER3/ErbB3	Yes	12		6	-0.43465	NA
4	WNT	XAV939	Tankyrase (TNKS1/2)	Preclinical studies	>25µM	NA	NA	NA	NA		Drug + Lapaitnib
5		ICG001	Binds to CBP, and disrupts CBP/β-catenin mediated transcription.	In Clinical trials	6.25	1.92	4.6875	21.2932	34.86		Drug + Afatinib
6		BC2059	Disrupts the binding of β-catenin with the scaffold protein transducin β-like 1 (TBL1)	Preclinical studies	0.5	0.0416667	0.1125	3.0973	10.99		Drug + Sapitinib
7		FZ7-21	Inhibits WNT receptor FZD7	Preclinical studies	>25µM	NA	NA	NA	NA		Potency ratio < 1, Drug is more effective than EGFRi
8		Salinomycin sodium salt	LRP6/Wnt pathway, Stemness, ABC transporter, VEGFR, AKT/mTOR. K+ channel opener.	Preclinical studies	0.22	0.0183333	0.166	1.6685	22.2862		Potency ratio > 1, Drug is less effective than EGFRi
9	PI3K/mTOR	Idelasilib	PI3K (p110δ/γ)	Yes	>25µM	NA	NA	NA	NA
10		Buparlisib	PI3K (p110α/β/γ/δ), PI3K (Vps34)	In Clinical trials	>25µM	NA	NA	NA	NA
11		Paxalisib	mTOR, PI3K (p110α/β/γ/δ)	Yes	0.75	0.0625	0.5625	4.8265	41.5009
12		Dactolisib	mTOR (p70S6K), PI3K (p110α/γ/δ), ATR	In Clinical trials	6.25	0.520833	4.6875	48.6113	79.2394
13	MAPK (KRAS)	AMG510	KRAS G12C	In Clinical trials	2	0.166667	1.5	9.7361	13.1271
14		MRTX849	KRAS G12C	In Clinical trials	>25µM	NA	NA	NA	NA
15	MAPK (RAF)	PLX8394	BRAFV600E	Preclinical studies	7	0.583333	5.25	18.8001	81.2108
16		Belvarafenib	Pan-Raf	In Clinical trials	>25µM	NA	NA	NA	NA
17		MLN2480	Pan-Raf	In Clinical trials	16	1.33333	12	11.1436	18.6474
18	Multi-tyrosine kinase	Bafetinib	Abl, Src/Lyn, DDR1	In Clinical trials	18.3	1.525	13.75	30.6749	94.3752
19		Sorafenib	c-Kit; FLT3; mPDGFRβ; PDGFRβ; B-Raf; B-Raf (V599E); Raf-1; VEGFR2/Flk2	Yes	1.93	0.160833	1.45	16.6596	52.5187
20		Ponatinib	Abl; c-Kit; FGFR1; PDGFRα; VEGFR2, c-Src; DDR1	Yes	3.75	0.3125	2.81	22.4866	90.1476
21		Midostaurin	PPK; PKCα; PKCβ1; PKCβ2; PKCγ	Yes	0.5	0.0416667	0.375	25.3628	32.3208
22	NTRKs	TPX0005	ALK/ROS1/NTRK 1/2/3 inhibitor	Preclinical studies	2.25	0.1875	1.68	43.6318	62.6981
23		Selintrectinib	NTRK 1/3 inhibitor	Preclinical studies	>25µM	NA	NA	NA	NA
24	Cell adhesion	VU6015929	DDR1 (NTRK4), DDR2	Preclinical studies	6.5	0.541667	4.875	6.9006	66.1585
25		DDR1 7rh	DDR1 (NTRK4)	Preclinical studies	3.75	0.3125	2.81	17.1398	72.4588
26	Developmental pathways	Crenigacetate	Gamma-secretase inhibitor (Notch1)	In Clinical trials	>25µM	NA	NA	NA	NA
27		GANT61	Hedgehog/Smoothened inhibitor (GLI)	Preclinical studies	>25µM	NA	NA	NA	NA
28		Itraconazole	Antifungal (P450 (CYP3A4)), mTOR, Hhg	Yes	1	0.0833333	0.75	0.6267	12.8785
29		BQ123	Endothelin A receptor antagonist	Preclinical studies	>25µM	NA	NA	NA	NA
30		Verteporfin	Inhibits YAP/TAZ (Hippo signaling)	Preclinical studies	0.19	0.0158333	0.1451	-0.3541	3.29843
31	Epigenetic regulators	Decitabine	DNA methyltransferase (DNMT)	Yes	>25µM	NA	NA	NA	NA
32		JQ1	BET-domain inhibitor (BRD4 (1/2))	Preclinical studies	1.7	0.141667	1.275	15.3891	31.8044
33		Vorinostat	HDAC; HDAC1;HDAC2;HDAC3;HDAC6;HDAC8	Yes	1.7	0.141667	1.275	59.2865	74.6415
DRUGS included in the investigation later:
	Multi-tyrosine kinase	Nilotinib	DDR1, BCR-ABL, ABL1	Yes	7.4 - 10µM	0.616667	7
		Dasatinib	DDR1, Bcr-Abl and Src family	Yes	18µM	1.5	9
		Imatinib	DDR1, c-Abl, Bcr-Abl, PDGFR, c-Kit	Yes	>10µM	1.25	9
	SRC kinase	KB-SRC-4	SRC kinase	Preclinical studies	1.4	0.116667	1.4
	BCR-ABL	GMB-475	BCR-ABL	Preclinical studies	3	0.25	3

## Sheet: S1.3_Combinations (COAD, GBM)
INDEX	INHIBITOR	TARGET	COAD spheroids								GBM Spheroids
			HCT116 (N2EF)		HCT116 (N2N21)		DLD1		SW480		U251
			~ IC50 values:	Concentration used in combination	~ IC50 values:	Concentration used in combination	~ IC50 values:	Concentration used in combination	~ IC50 values:	Concentration used in combination	~ IC50 values:	Concentration used in combination
1	Afatinib	EGFR (L858R); EGFR (L858R/T790M); EGFR (WT); HER2; HER4	12µM	6µM	8.9µM	4µM	4.2µM	3µM	~10µM	5µM	NA	NA
2	Lapatinib	EGFR; HER2/ErbB2	12µM	6µM	29µM	10µM	11.3µM	8µM	20-30µM	20µM	4.5µM	4.5µM	Key:
3	PLX8394	BRAFV600E	7µM	5.25µM	8.9µM	5µM	5.4µM	4µM	7.5µM	6µM	NA	NA	NA, Not applicable (Experiment not performed)
4	Dactolisib	mTOR (p70S6K), PI3K (p110α/γ/δ), ATR	6.25µM	4.68µM	NR (<50nM)	NA	NR (<100nM)	0.07µM	<1µM	1µM	NA	NA	NR: Not reachable (Experiment performed, but desired outcome was not reached)
5	VU6015929	DDR1 (NTRK4), DDR2	6.5µM	4.87µM	24.5µM	10µM	13.7µM	9µM	13µM	12µM	NA	NA
6	DDR1 7RH	DDR1 (NTRK4)	3.75µM	2.81µM	6.1µM	6µM	8.4µM	5µM	4µM	3µM	3-9µM	3µM
7	Ponatinib	Abl; c-Kit; FGFR1; PDGFRα; VEGFR2, c-Src; DDR1	3.75µM	2.81µM	3.65µM	1µM	1.3µM	1µM	6-12µM	3µM	NA	NA
8	Bafetinib	Abl, Src/Lyn, DDR1	18.3µM	13.74µM	21µM	15µM	17.8µM	12µM	23µM	10µM	NA	NA
9	Nilotinib	DDR1, BCR-ABL, ABL1	7.4 - 10µM	7µM	NA	NA	NA	NA	4.2µM	3µM	10-25µM	15µM
10	GMB-475	BCR-ABL	3µM		NA		NA		NA		3µM
11	KB-SRC-4	SRC kinase	1.4µM		NA		NA		NA		NR
Multi-spehroid assays for DDR1/BCR-ABL inhibitors:
Spheroid viability assay performed at Early time-point (i.e. Drugs added after 24hrs and measurements done within 24hrs)
Cell line	Drug	~ IC50 value estimated (see sheet S1.2)	Doses used in combination	Combinations tested	% Inhibition obtained by drugs alone	% inhibition by drug+Lapatinib	Fold change in Inhibition (Drug+EGFRi vs EGFRi alone)	Fold change in Inhibition (Drug+EGFRi vs Drug alone)
Spheroid viability assay performed at Optimal time-points (i.e. treatments performed at early exponential phase of growth)
HCT116 (COAD)	Lapatinib	12µM	7.5µM		0.057	NA	NA	NA
	Nilotinib	7-10µM	7µM	7µM (+ 7.5µM Lapatinib)	0.089	0.84	16.7	9.5
	Lapatinb	12µM	6-8µM		32%, 6.5%	NA
	Bafetinib	18µM	13.7µM	13.7µM (+ 6µM Lapatinib)	0.3115	0.99	15.2308	3.17817
	Ponatinib	3.75µM	2.8µM	2.8µM (+ 6µM Lapatinib)	0.307	0.944	14.5231	3.07492
	Dasatinib	18µM	9µM	9µM (+ 6µM Lapatinib)	0.109	0.968	3.025	8.88073
	Imatinib	>10µM	9µM	9µM (+ 6µM Lapatinib)	-0.101	0.96	3	NA
	Nilotinib	7.4 - 10µM	7µM	7µM (+ 6µM Lapatinib)	0.344	0.936	2.925	2.71512
	KB-SRC-4	1.4µM	0.7µM	0.7µM (+ 6µM Lapatinib)	-0.075	0.614	1.91875	NA
	GMB475	3µM	1.5µM	1.5µM (+ 6µM Lapatinib)	-0.06	0.73	2.28125	NA
	DDR1 7RH	3.75µM	2.8µM	2.8µM (+ 6µM Lapatinib)	0.225	0.9	13.8462	4
DLD1 (COAD)	Lapatinb	11.3µM	8µM		0.57	NA	NA	NA
	Bafetinib	17.8µM	12µM	12µM (+ 8µM Lapatinib)	0.385	0.957	1.67	2.48
	Ponatinib	1.3µM	1µM	1µM (+ 8µM Lapatinib)	0.5547	0.966	1.69	1.7
	DDR1 7RH	8.4µM	5µM	5µM (+ 8µM Lapatinib)	0.636	0.984	1.72	1.55
SW480 (COAD)	Lapatinib	20-30µM	20µM			NA	NA	NA
	Nilotinib	4.2µM	3µM	3µM (+ 20µM Lapatinib)	0.042	0.93	2.8	21.9
	Bafetinib	23µM	10µM	10µM (+ 20µM Lapatinib)	0	0.98	NA	23.3
	Ponatinib	6-12µM	3µM	3µM (+ 20µM Lapatinib)	0	0.98	NA	23.3
	DDR1 7RH	4µM	3µM	3µM (+ 20µM Lapatinib)	0.61	0.997	23.7	1.65
U251 (GBM)	Lapatinib	4.5µM	4.5µM		0	NA	NA	NA
	Nilotinib	10-25µM	15µM	15µM (+ 4.5µM Lapatinib)	0.39	0.97	NA	2.487
GBM965 (GBM-PDX)	Lapatinib	0.8uM	0.5µM		0.366	NA	NA	NA
	Nilotinib	13uM	1µM	1µM (+ 0.5µM Lapatinib)	0.364	0.709		1.94444
	GMB475	3.5uM	1µM	1µM (+ 0.5µM Lapatinib)	0.547	0.809		1.47273
	DDR1 7RH	1.5uM	1µM	1µM (+ 0.5µM Lapatinib)	0.325	0.781		2.36364
Q108 (GBM-PDX)	Lapatinib	2.95uM	1.5µM		0.068	NA	NA	NA
	Nilotinib	6.5uM	3µM	3µM (+ 1.5µM Lapatinib)	0.246	0.537		2.25
	GMB475	4.8uM	2µM	2µM (+ 1.5µM Lapatinib)	0.029	0.377		13
	DDR1 7RH	0.95uM	0.75µM	0.75µM (+ 1.5µM Lapatinib)	0.026	0.574		22.0769
Spheroid viability assay performed at Late time-point (i.e. treatments performed during late-exponential phase of growth)
HCT116 (COAD)	Lapatinib	12µM	7.5µM		0.1	NA	NA	NA
	Nilotinib	7-10µM	7µM	7µM (+ 7.5µM Lapatinib)	0.0956	0.573	5.7	6
	Bafetinib	18µM	6.5µM	6.5µM (+ 7.5µM Lapatinib)	0.03	0.27	2.7	9
U251 (GBM)	Lapatinib	4.5µM	4.5µM		0	NA	NA	NA
	Nilotinib	10-25µM	15µM	15µM (+ 4.5µM Lapatinib)	0	0.37	NA	NA
	DDR1 7RH	3-7µM	3µM	3µM (+ 4.5µM Lapatinib)	0	0.2	NA	NA
SUMMARY:
Best Combinations and ratios obtained:			In cells more resistant to Lapatinib
Drug 1	Drug 2	Ratio (Drug 1: Drug2)	Ratio (Drug 1: Drug2)
Lapatinib	Bafetinib	(1:1 or 1:2)	≥(2:1)
Lapatinib	Ponatinib	(2:1 or 3:1)	≥(3:1)
Lapatinib	Nilotinib	(1:1)	≥(3:1)
Lapatinib	DDR1 7RH	(2:1)	≥(3:1)
Lapatinib	PLX8394	(2:1)	≥(3:1)

## Sheet: S1.4_Percent inhibition (COAD)
Percent (%) inhibition caculated for drugs in combination with EGFR small molecule inhibitors in multi-spheroid assays.
Preliminary screening of efficacy of drugs alone or in combination with EGFR small molecule inhibitors, Lapatinib, Afatinib and Sapitinib, in HCT116 spheroids (cultured in N2EF media).									FINAL TABLE on % inhibition obtained for drugs in combination with EGFR inhibitiors (avaeraged values) in HCT116 spheroids.
S.No.	Drugs/combinations administered	% Inhibition obtained for Drugs±EGFRi			Average of % Inhibition observed	SEM	TTEST		S.No.	Drugs/combinations administered	Average of % Inhibition observed	Fold change in Inhibition (Drug+EGFRi/Drug alone)
		Lapatinib	Afatinib	Sapatinib			Drugs vs Drugs+EGFRi
1	PRI724	21.2932	21.2932	21.2932	21.2932	0			1	PRI724	21.2932
	PRI724 + EGFRi	41.0781	35.0294	28.4756	34.861	2.97123	0.0203243	*		PRI724 + EGFRi	34.861	1.63719
2	BC2059	3.0973	3.0973	3.0973	3.0973	0			2	BC2059	3.0973
	BC2059 + EGFRi	11.7211	12.4868	8.7812	10.9964	0.922171	0.00219932	**		BC2059 + EGFRi	10.9964	3.55031
3	Salinomycin	1.6685	1.6685	1.6685	1.6685	1.28198e-16			3	Salinomycin	1.6685
	Salinomycin + EGFRi	41.5799	23.8025	1.4762	22.2862	9.47278	0.150187			Salinomycin + EGFRi	22.2862	13.357
4	AMG 510	9.7361	9.7361	9.7361	9.7361	0			4	AMG 510	9.7361
	AMG 510 + EGFRi	17.841	13.5062	8.0341	13.1271	2.31668	0.298049			AMG 510 + EGFRi	13.1271	1.34829
5	MLN2480	11.1436	11.1436	11.1436	11.1436	0			5	MLN2480	11.1436
	MLN2480 + EGFRi	20.4462	24.2403	11.2556	18.6474	3.1474	0.123435			MLN2480 + EGFRi	18.6474	1.67337
6	Sorafenib	16.6596	16.6596	16.6596	16.6596	0			6	Sorafenib	16.6596
	Sorafenib + EGFRi	96.3487	34.2424	26.9651	52.5187	17.9755	0.178683			Sorafenib + EGFRi	52.5187	3.15246
7	Midostaurin	25.3628	25.3628	25.3628	25.3628	0			7	Midostaurin	25.3628
	Midostaurin + EGFRi	22.3562	45.7588	28.8474	32.3208	5.69539	0.374974			Midostaurin + EGFRi	32.3208	1.27434
8	Verteporfin	-0.3541	-0.3541	-0.3541	-0.3541	0			8	Verteporfin	-0.3541
	Verteporfin + EGFRi	7.6006	3.9393	-1.6446	3.29843	2.19476	0.245778			Verteporfin + EGFRi	3.29843	-9.31498
9	Itraconazole	0.6267	0.6267	0.6267	0.6267	0			9	Itraconazole	0.6267
	Itraconazole + EGFRi	18.14	14.2404	6.255	12.8785	2.85597	0.0248359	*		Itraconazole + EGFRi	12.8785	20.5497
10	JQ1	15.3891	15.3891	15.3891	15.3891	0			10	JQ1	15.3891
	JQ1 + EGFRi	33.2234	38.0768	24.1131	31.8044	3.34187	0.0159879	*		JQ1 + EGFRi	31.8044	2.06669
	EGFRi	6.9552	5.9348	0.5781	4.48937	1.61478			11	Paxalisib	4.8265
	DMSO	0	0	0	0	0				Paxalisib + EGFRi	41.5009	8.59855
									12	Dactolisib	48.6113
11	Paxalisib	4.8265	4.8265	4.8265	4.8265	0				Dactolisib + EGFRi	79.2394	1.63006
	Paxalisib + EGFRi	44.9108	57.2829	22.309	41.5009	8.36014	0.0231301	*	13	PLX8394	18.8001
12	Dactolisib	48.6113	48.6113	48.6113	48.6113	0				PLX8394 + EGFRi	81.2108	4.3197
	Dactolisib + EGFRi	97.8823	76.4867	63.3491	79.2394	8.21676	0.0382709	*	14	Bafetinib	30.6749
13	PLX8394	18.8001	18.8001	18.8001	18.8001	0				Bafetinib + EGFRi	94.3752	3.07663
	PLX8394 + EGFRi	99.5719	89.5758	54.4847	81.2108	11.1624	0.0102984	*	15	Ponatinib	22.4866
14	Bafetinib	30.6749	30.6749	30.6749	30.6749	0				Ponatinib + EGFRi	90.1476	4.00895
	Bafetinib + EGFRi	99.695	99.7715	83.659	94.3752	4.37489	0.000286699	***	16	TPX0005	43.6318
15	Ponatinib	22.4866	22.4866	22.4866	22.4866	2.05116e-15				TPX0005 + EGFRi	62.6981	1.43698
	Ponatinib + EGFRi	99.6733	98.217	72.5524	90.1476	7.19139	0.00154418	**	17	VU6015929	6.9006
16	TPX0005	43.6318	43.6318	43.6318	43.6318	0				VU6015929 + EGFRi	66.1585	9.58735
	TPX0005 + EGFRi	65.6493	71.277	51.1681	62.6981	4.89044	0.0334306	*	18	DDR1 7rh	17.1398
17	VU6015929	6.9006	6.9006	6.9006	6.9006	0				DDR1 7rh + EGFRi	72.4588	4.22752
	VU6015929 + EGFRi	99.5794	70.2306	28.6655	66.1585	16.797	0.0449904	*	19	Vorinostat	59.2865
18	DDR1 7rh	17.1398	17.1398	17.1398	17.1398	0				Vorinostat + EGFRi	74.6415	1.259
	DDR1 7rh + EGFRi	99.6284	88.7338	29.0141	72.4588	17.9211	0.0653316			EGFRi	4.23903
19	Vorinostat	59.2865	59.2865	59.2865	59.2865	0				DMSO	0
	Vorinostat + EGFRi	77.9969	80.2736	65.654	74.6415	3.70817	0.0277598	*
	EGFRi	6.967	9.5595	-1.4474	5.02637	2.71263
	DMSO	0	0	0	0	0
	Drugs were selected based on criteria:		(a)	If % inhibition obtained for atleast two out of three EGFRi were ≥ 50%					Based on criteria (a) and (b), drug combinations identified were: PLX8394, Bafetinib, Ponatinib, VU6015929, DDR1 7rh
			(b)	If fold change between Drugs+EGFRi verses Drug alone, was ≥ 2
	Average of %Inhibition estimated for Drugs ± EGFRi in HCT116, DLD1 and SW480 spheroids (administered with Drugs+ EGFRi, Lapatinib, Afatinib) during multispheroid assays.
	Drugs/combinations administered	Average of % Inhibition observed in each cell line			Average of % Inhibition obtained for all 3 cell lilnes	Fold change			Based on the testing and validation in three KRAS mutant cell lines (HCT116, DLD1 and SW480), drug combinations that were identified to have: ≥90% inhibition in combination with EGFR inhibitiors (Lapatinib, Afatinib), and ≥ 2 fold change as compared to drugs administered alone are:
		HCT116	DLD1	SW480		(Drug vs Drug + EGFRi)
	DMSO	0	0	0					Drugs		Targets
	EGFRi (Lapatinib, Afatinib)	6.5196	57.0384	1.49255	21.6835				PLX8394		RAF, BRAFV600E
	PLX8394	12.9108	54.6715	13.1468	26.9097				Bafetinib		Abl, Src/Lyn, DDR1
	PLX8394 + EGFRi	97.4283	95.3308	66.0396	86.2662	3.20577			Ponatinib		Abl; c-Kit; FGFR1; PDGFRα; VEGFR2, c-Src; DDR1
	Dactolisib	48.6113	52.1616	40.6598	47.1442				VU6015929		DDR1 (NTRK4), DDR2
	Dactolisib + EGFRi	97.8823	75.9115	56.8512	76.8817	1.63078			DDR1 7rh		DDR1 (NTRK4)
	Bafetinib	31.156	38.5109	-13.8423	18.6082
	Bafetinib+EGFR-i	99.0791	95.7125	57.9726	84.2547	4.52783
	Ponatinib	9.37755	55.4733	5.2089	23.3532
	Ponatinib+EGFR-i	97.3974	96.5751	57.6195	83.864	3.59111
	DDR1 7rh	11.2173	63.5656	28.7075	34.4968
	DDR1 7rh+EGFR-i	99.5078	98.3755	92.489	96.7908	2.80579
	VU6015929	23.6116	61.8347	20.5128	35.3197
	VU6015929+EGFR-i	97.5495	90.5986	68.8486	85.6656	2.42543

## Sheet: S1.5_Synergy Plots
INHIBITOR - 1	Inhibitor-1 concentration used Synergy experiments:	INHIBITOR - 2	Inhibitor-2 concentration used Synergy experiments:		INHIBITOR - 1	Inhibitor-1 concentration used Synergy experiments:	INHIBITOR - 2	Inhibitor-2 concentration used Synergy experiments:
	HCT116 (N2EF) COAD spheroids		HCT116 (N2EF) COAD spheroids			HCT116 (N2EF) COAD spheroids		HCT116 (N2EF) COAD spheroids
Lapatinib	15µM	PLX8394	10µM		Afatinib	15µM	PLX8394	10µM
	10µM		6µM			10µM		6µM
	5µM		3µM			5µM		3µM
	2.5µM		1.5µM			2.5µM		1.5µM
	0.8µM		0.5µM			0.8µM		0.5µM
Lapatinib	15µM	VU6015929	10µM		Afatinib	15µM	VU6015929	10µM
	10µM		6µM			10µM		6µM
	5µM		3µM			5µM		3µM
	2.5µM		1.5µM			2.5µM		1.5µM
	0.8µM		0.5µM			0.8µM		0.5µM
Lapatinib	28µM	DDR1 7RH	6µM		Afatinib	28µM	DDR1 7RH	6µM
	14µM		3µM			14µM		3µM
	7µM		1.5µM			7µM		1.5µM
	2.4µM		0.5µM			2.4µM		0.5µM
	1.2µM		0.25µM			1.2µM		0.25µM
Lapatinib	50µM	Bafetinib	37.5µM		Afatinib	50µM	Bafetinib	37.5µM
	28µM		26µM			28µM		26µM
	14µM		13µM			14µM		13µM
	7µM		6.5µM			7µM		6.5µM
	4.8µM		3.5µM			4.8µM		3.5µM
Lapatinib	28µM	Ponatinib	6µM		Afatinib	28µM	Ponatinib	6µM
	14µM		3µM			14µM		3µM
	7µM		1.5µM			7µM		1.5µM
	2.4µM		0.5µM			2.4µM		0.5µM
	1.2µM		0.25µM			1.2µM		0.25µM
INHIBITOR - 1	Inhibitor-1 concentration used Synergy experiments:	INHIBITOR - 2	Inhibitor-2 concentration used Synergy experiments:
	HCT116 (N2EF) COAD spheroids		HCT116 (N2EF) COAD spheroids
Lapatinib	7.5µM	Nilotinib	30µM
	3.75µM		15µM
	1.75µM		7µM
	0.75µM		3µM
	0.375µM		1.5µM
INHIBITOR - 1	Inhibitor-1 concentration used Synergy experiments:	INHIBITOR - 2	Inhibitor-2 concentration used Synergy experiments:
	U251 (GBM) spheroids		U251 (GBM) spheroids
Lapatinib	6µM	Nilotinib	20µM
	4.5µM		15µM
	3µM		10µM
	1.5µM		5µM
	0.75µM		2.5µM
Synergy scores estimated at >95% confidence (using MacSynergy-II), in HCT116 (COAD) spheroids and U251 (GBM) spheroids :
			Drug Interactions		Max. Synergy obtained at:
Cell Line	Drug 1	Drug 2	Synergy Score	Antagonism	Drug 1	Drug 2	Synergy score
HCT116	Lapatinib	Bafetinib	1123.4	0	7µM	6.5µM	101.45
		Ponatinib	928.87	0	7µM	3µM	93.3
		DDR1 7rh	561.5	0	2.4µM	3µM	93.2
		VU6015929	458.13	-12.44	10µM	6µM	78.78
		PLX3894	910.15	0	15µM	6µM	100.3
	Afatinib	Bafetinib	119.18	-0.29	4.8µM	13µM	27.13
		Ponatinib	308.25	-0.02	2.4µM	3µM	64.04
		DDR1 7rh	143.69	0	2.4µM	3µM	30
		VU6015929	46.05	0	10µM	6µM	10.43
		PLX3894	439.98	0	5µM	3µM	61.06
			Drug Interactions		Max. Synergy obtained at:
Cell Line	Drug 1	Drug 2	Synergy Score	Antagonism	Drug 1	Drug 2	Synergy score
HCT116	Lapatinib	Nilotinib	276.57	0	3.75µM	3µM	62.9
U251	Lapatinib	Nilotinib	469.3	0	1.5µM	15µM	45.96

## Sheet: S1.6_Cetuximab dose curves
CETUXIMAB used to evaluate cetuximab sensitivity in HCT116 (COAD) cells
Antibody concentration	Final concentration of antibody	Final concentration of antibody
µg/100ul	µg/ml	µg/well
50	250	25
10	50	5
5	25	2.5
1	5	0.5
0.5	2.5	0.25
0.25	1.25	0.125
0.05	0.25	0.025
0.025	0.125	0.0125
0	0	0
